# Supplementary material
Source: publisher figshare collection journal article supplement (https://acs.figshare.com/ndownloader/files/5131039)
Supplement: Supplementary file 1 [file 5131039]

# A Straightforward and Flexible [4+2] Route to $\beta$ -C-Naphthyl-2-Deoxy-glycosides through Tandem Hydroboration-Ketal Reduction : *De novo* Access to C-Naphthyl-6-Fluoro and 6,6-Difluoro 2-Deoxyglycosides

Nguyen Quang Vu <sup>a</sup>, Stephane Leconte <sup>a</sup>, Eric Brown <sup>a</sup>, Danielle Grée <sup>b</sup>, René Grée <sup>b</sup>, Gilles Dujardin <sup>a</sup> \*

<sup>a</sup> UCO2M , UMR CNRS 6011, Université du Maine, 72085 Le Mans Cedex 9, France.

<sup>b</sup> SESO , UMR CNRS 6510, Université de Rennes I, 35042 Rennes Cedex, France.

## Supporting Information

### Summary :

*SI* : General Methods for the Experimental Section

*S-2/S-24 : Copies of <sup>1</sup>H NMR spectra :* Figure S-2: (**6**); Figure S-3: (**epi-6**); Figure S-4: (**4b**); Figure S-5: (**epi-4b**); Figure S-6: (**7b**); Figure S-7: (**4c**); Figure S-8: (**9**); Figure S-9: (**10**); Figure S-10: (**11**); Figure S-11: (**12**); Figure S-12: (**4d**); Figure S-13: (**4e**); Figure S-14: (**4f**); Figure S-15: (**4g**); Figure S-16: (**4h**); Figure S-17: (**5a**); Figure S-18: (**8a**); Figure S-19: (**5c**); Figure S-20: (**5d**); Figure S-21: (**5e**); Figure S-22: (**5f**); ); Figure S-23: (**5g**); Figure S-24: (**5h**).

**General Methods for the Experimental Section.** The reagents were purchased from commercial suppliers and used without purification. All solvents were dried using standard procedures. Column chromatography was performed with 40-60  $\mu$ m silica gel under medium pressure (1 bar). All melting points are uncorrected. Infrared spectra were performed on an FT spectrophotometer. <sup>1</sup>H and <sup>13</sup>C NMR spectra were recorded on 400 MHz spectrometers in CDCl<sub>3</sub> with TMS as reference. LCMS (EI or CI) were performed on a particle beam mass spectrometer.



# Ester epi-6

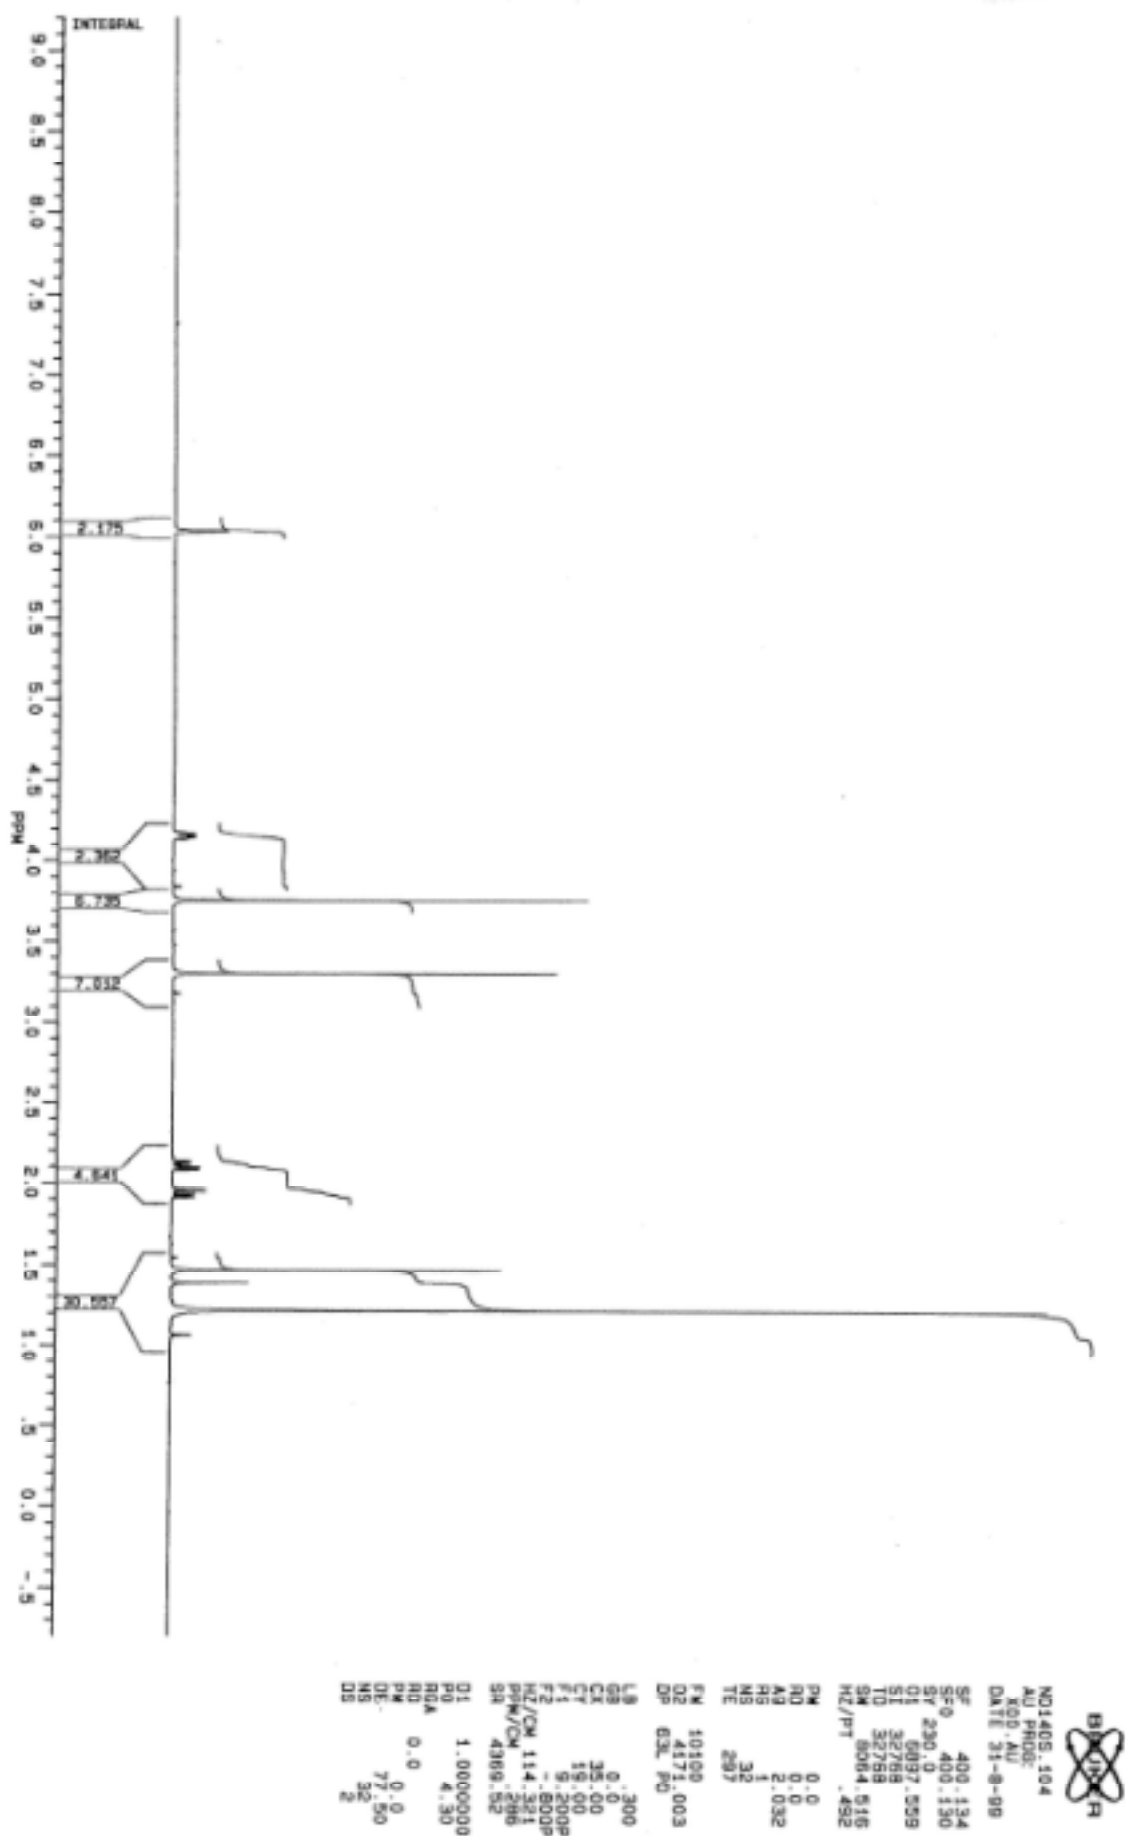

# Alcohol 4b

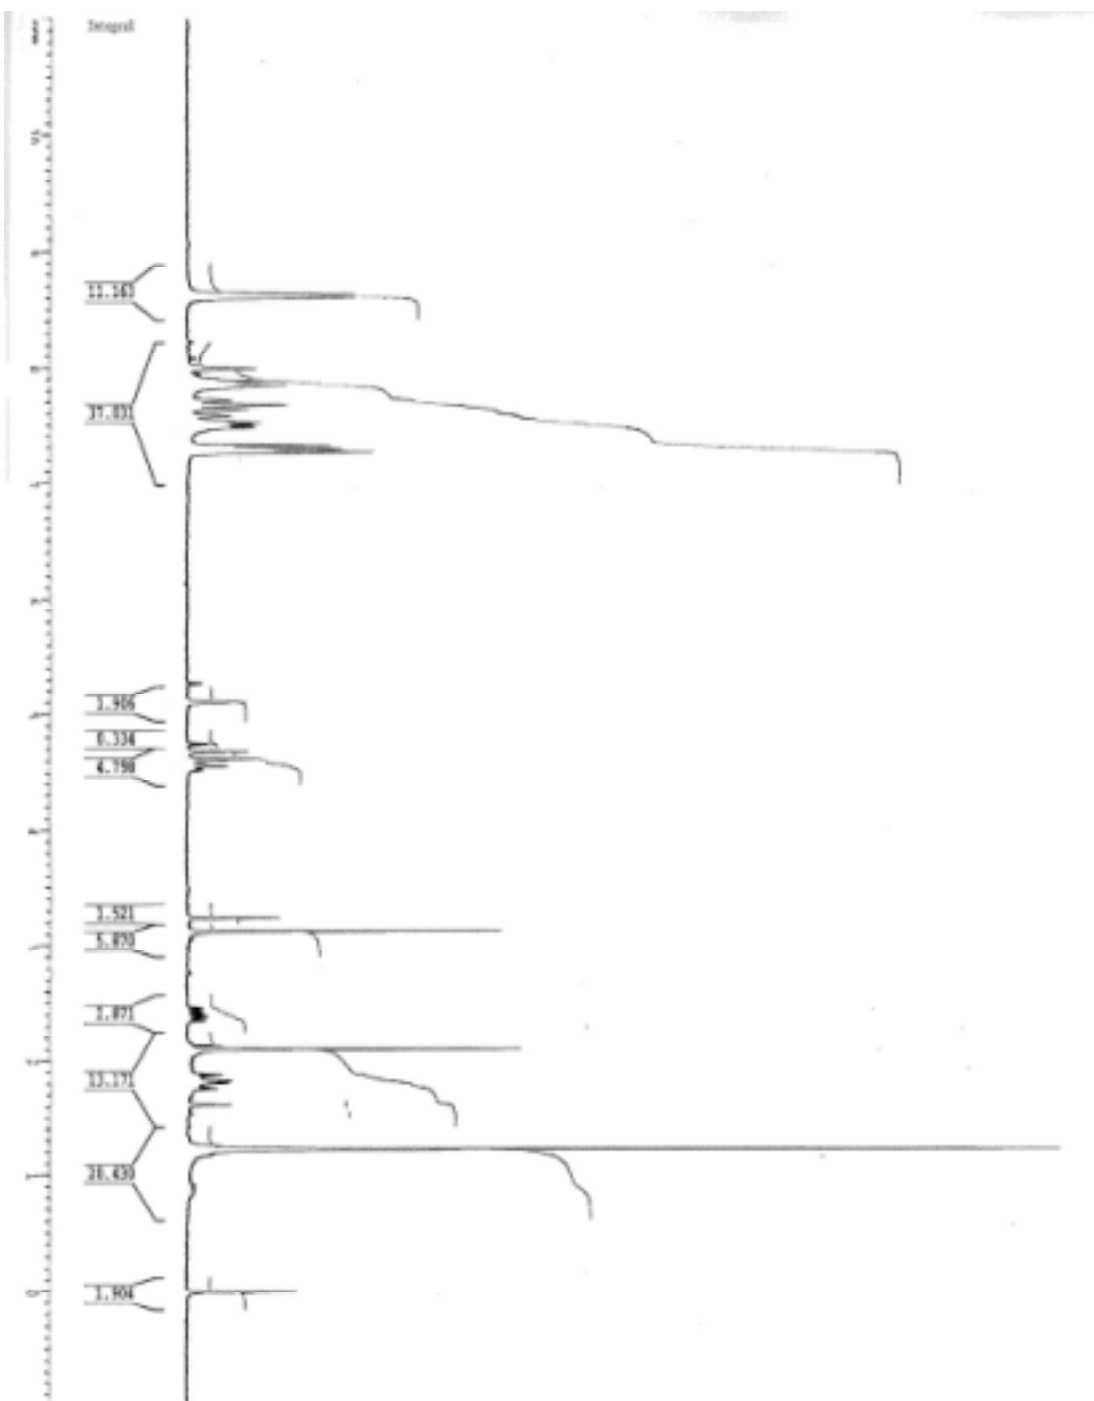

|                             |                |
|-----------------------------|----------------|
| Current Data Parameters     |                |
| NAME                        | 2ac17-202      |
| EXPNO                       | 150            |
| PROCNO                      | 1              |
| F2 - Acquisition Parameters |                |
| Instr_                      | 10001117       |
| Time                        | 17.15          |
| INSTRUM                     | spect          |
| PROBHD                      | 5 mm QNP 1H    |
| PULPROG                     | zg30           |
| TD                          | 32768          |
| ACQPROG                     | zgpg30         |
| RG                          | 16             |
| RG2                         | 2              |
| RG3                         | 4139.073 Hz    |
| RG4                         | 9.136514 Hz    |
| RG5                         | 3.958423 sec   |
| RG6                         | 5160.6         |
| RG7                         | 128.870 kHz    |
| RG8                         | 9.50 kHz       |
| RG9                         | 303.0 K        |
| RG10                        | 1.0000000 sec  |
| ===== CHANNEL f1 =====      |                |
| NUC1                        | 1H             |
| P1                          | 9.50 kHz       |
| PL1                         | -4.00 dB       |
| PR1                         | 200.131259 MHz |
| F2 - Processing parameters  |                |
| SI                          | 32768          |
| SF                          | 200.135075 MHz |
| WDW                         | EM             |
| SSB                         | 0              |
| LB                          | 0.50 Hz        |
| GB                          | 0              |
| PC                          | 1.00           |
| 1D NMR plot parameters      |                |
| CA                          | 36.00 cm       |
| F1P                         | 11.000 ppm     |
| F1                          | 2281.43 Hz     |
| F2P                         | -1.000 ppm     |
| F2                          | -200.11 Hz     |
| PRINCM                      | E-6010 exp/cm  |
| ISCM                        | 81.8510 Hz/cm  |

# Alcohol epi-4b

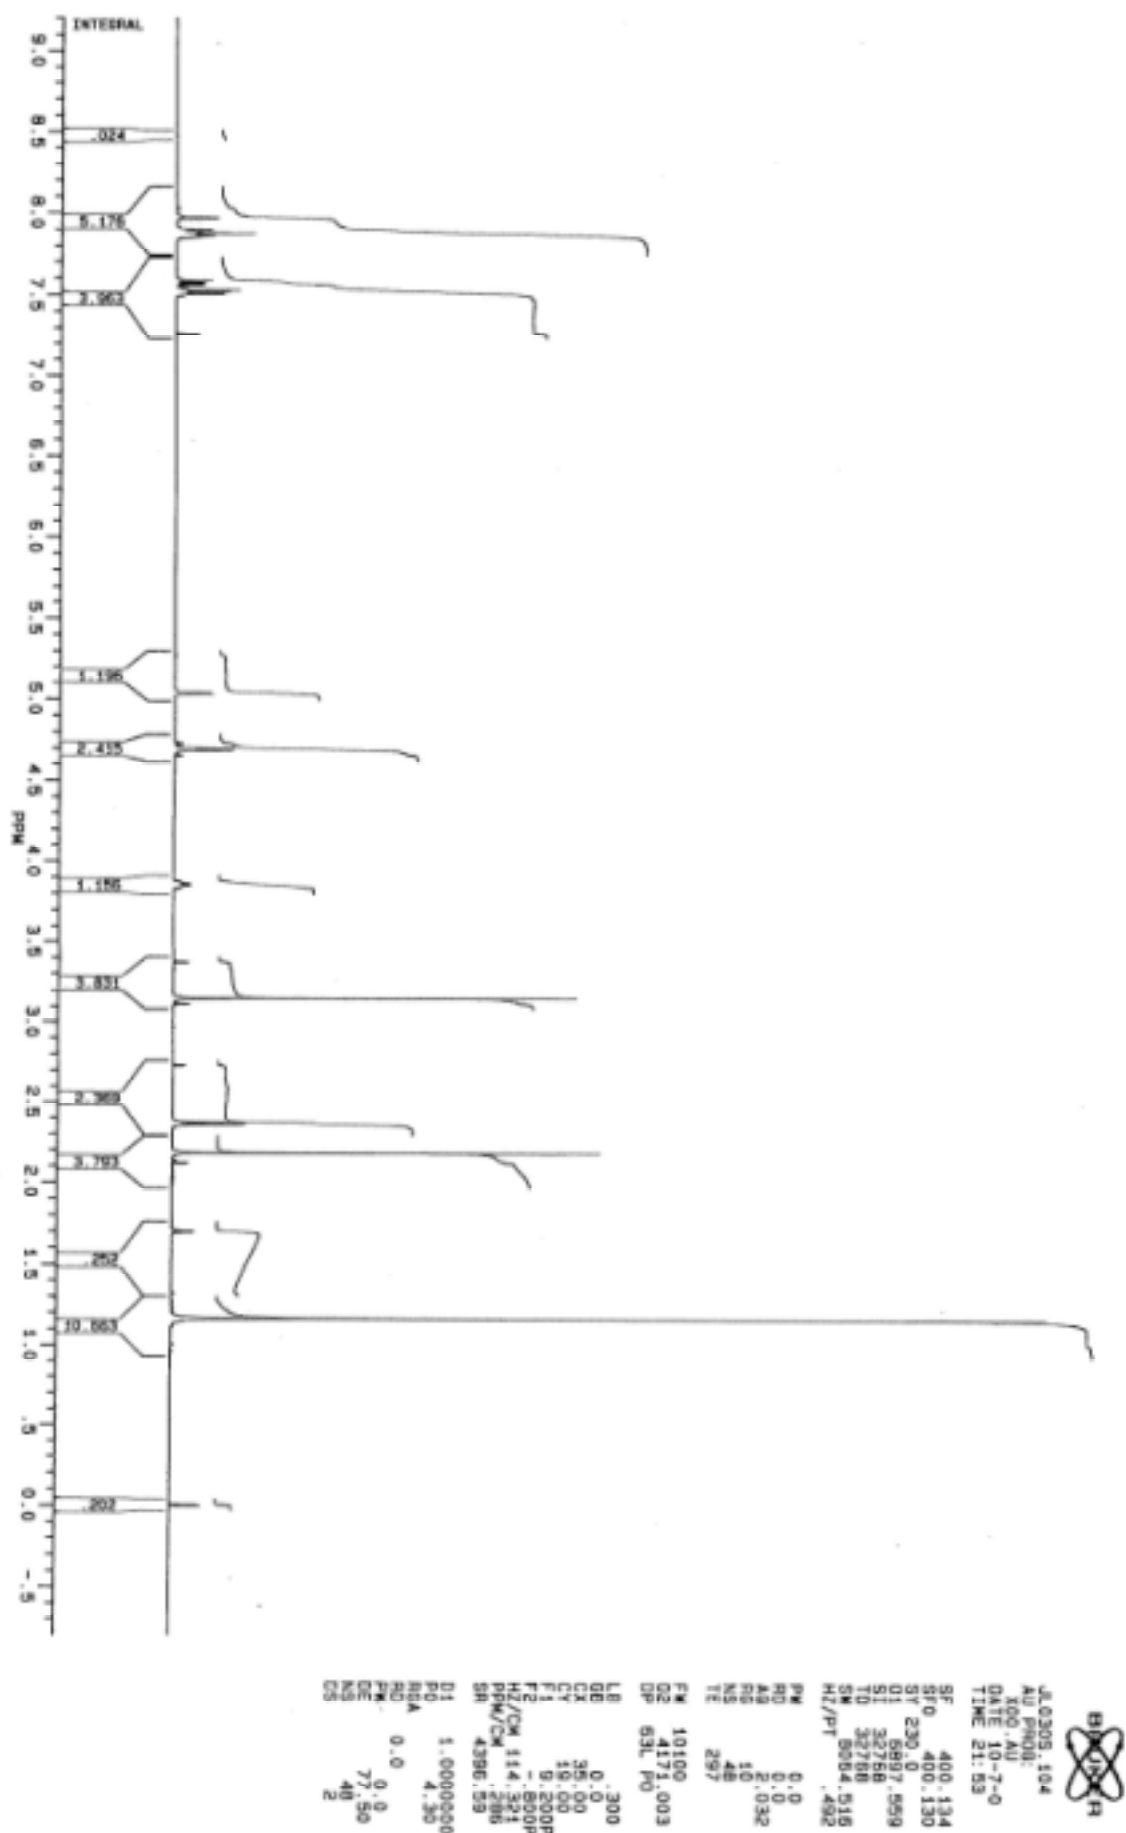

# Acetate 7b

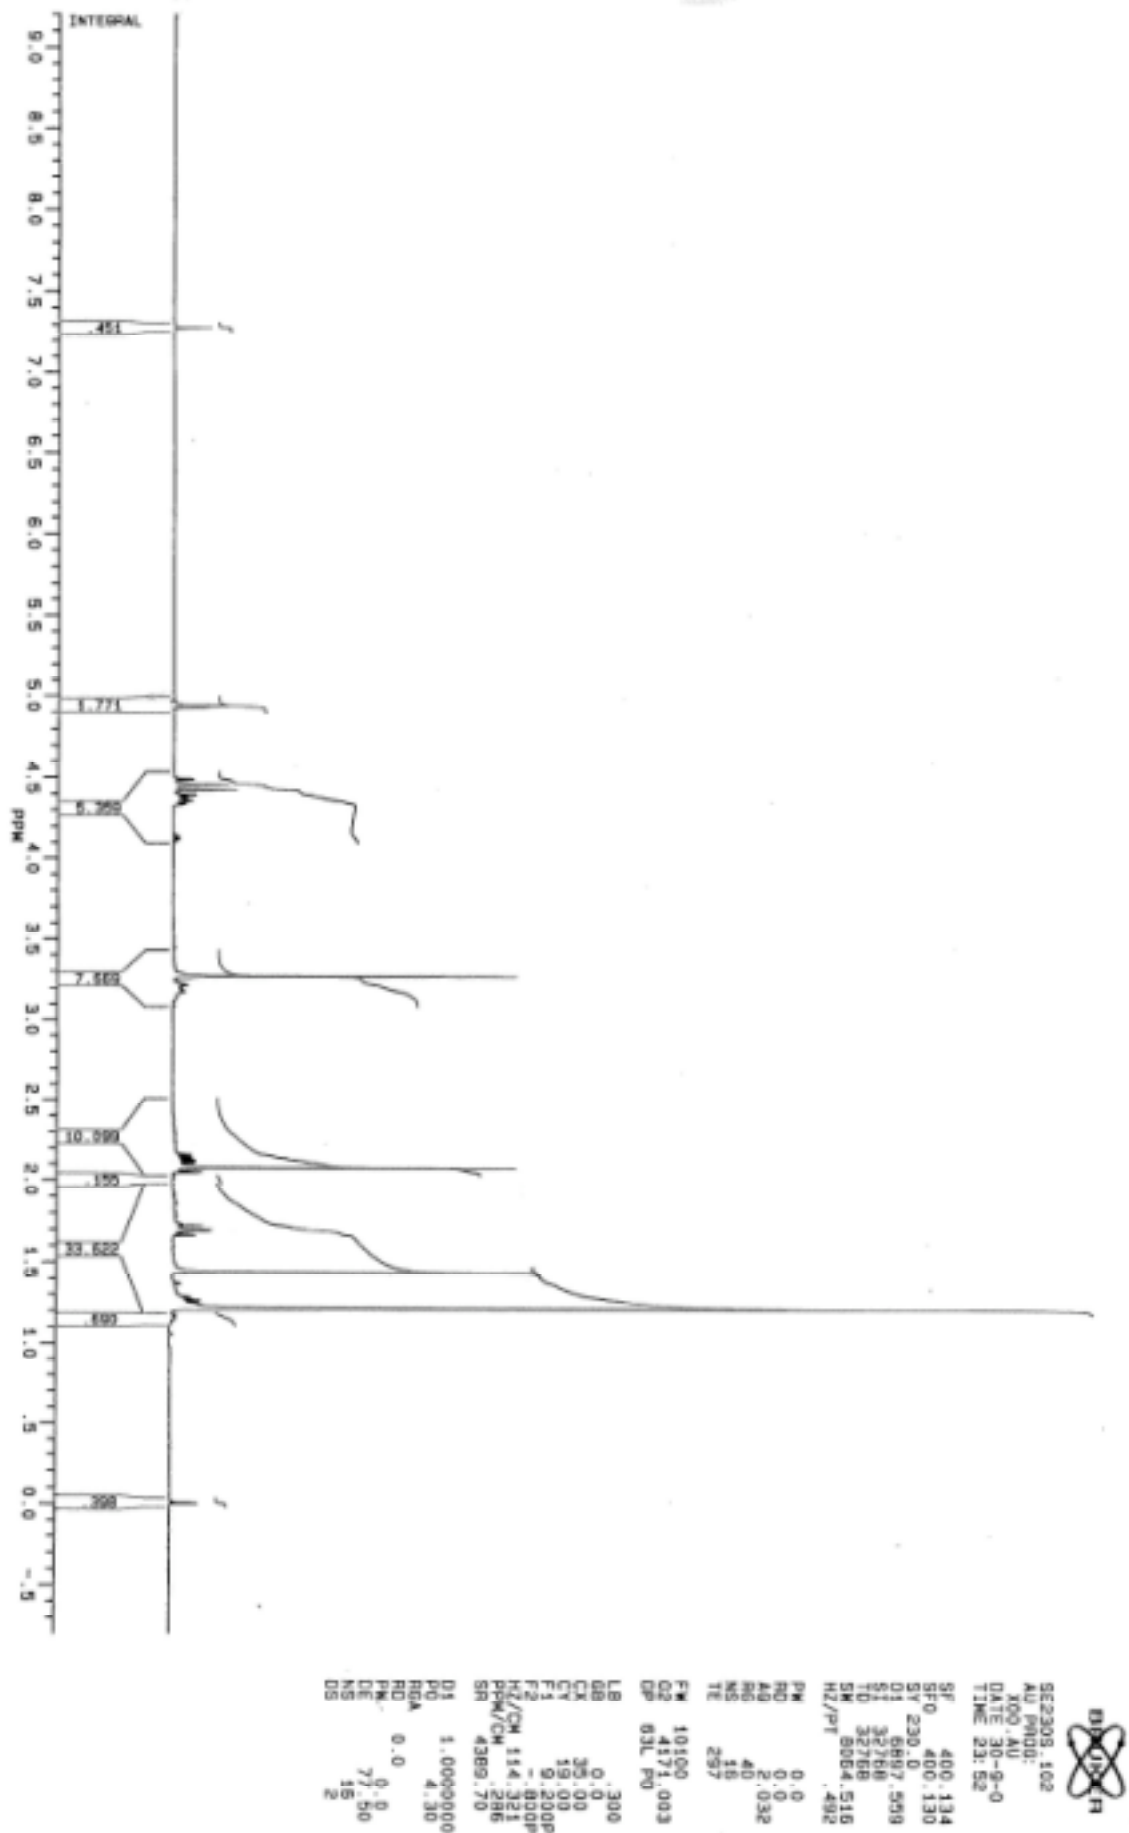

# Ether 4c

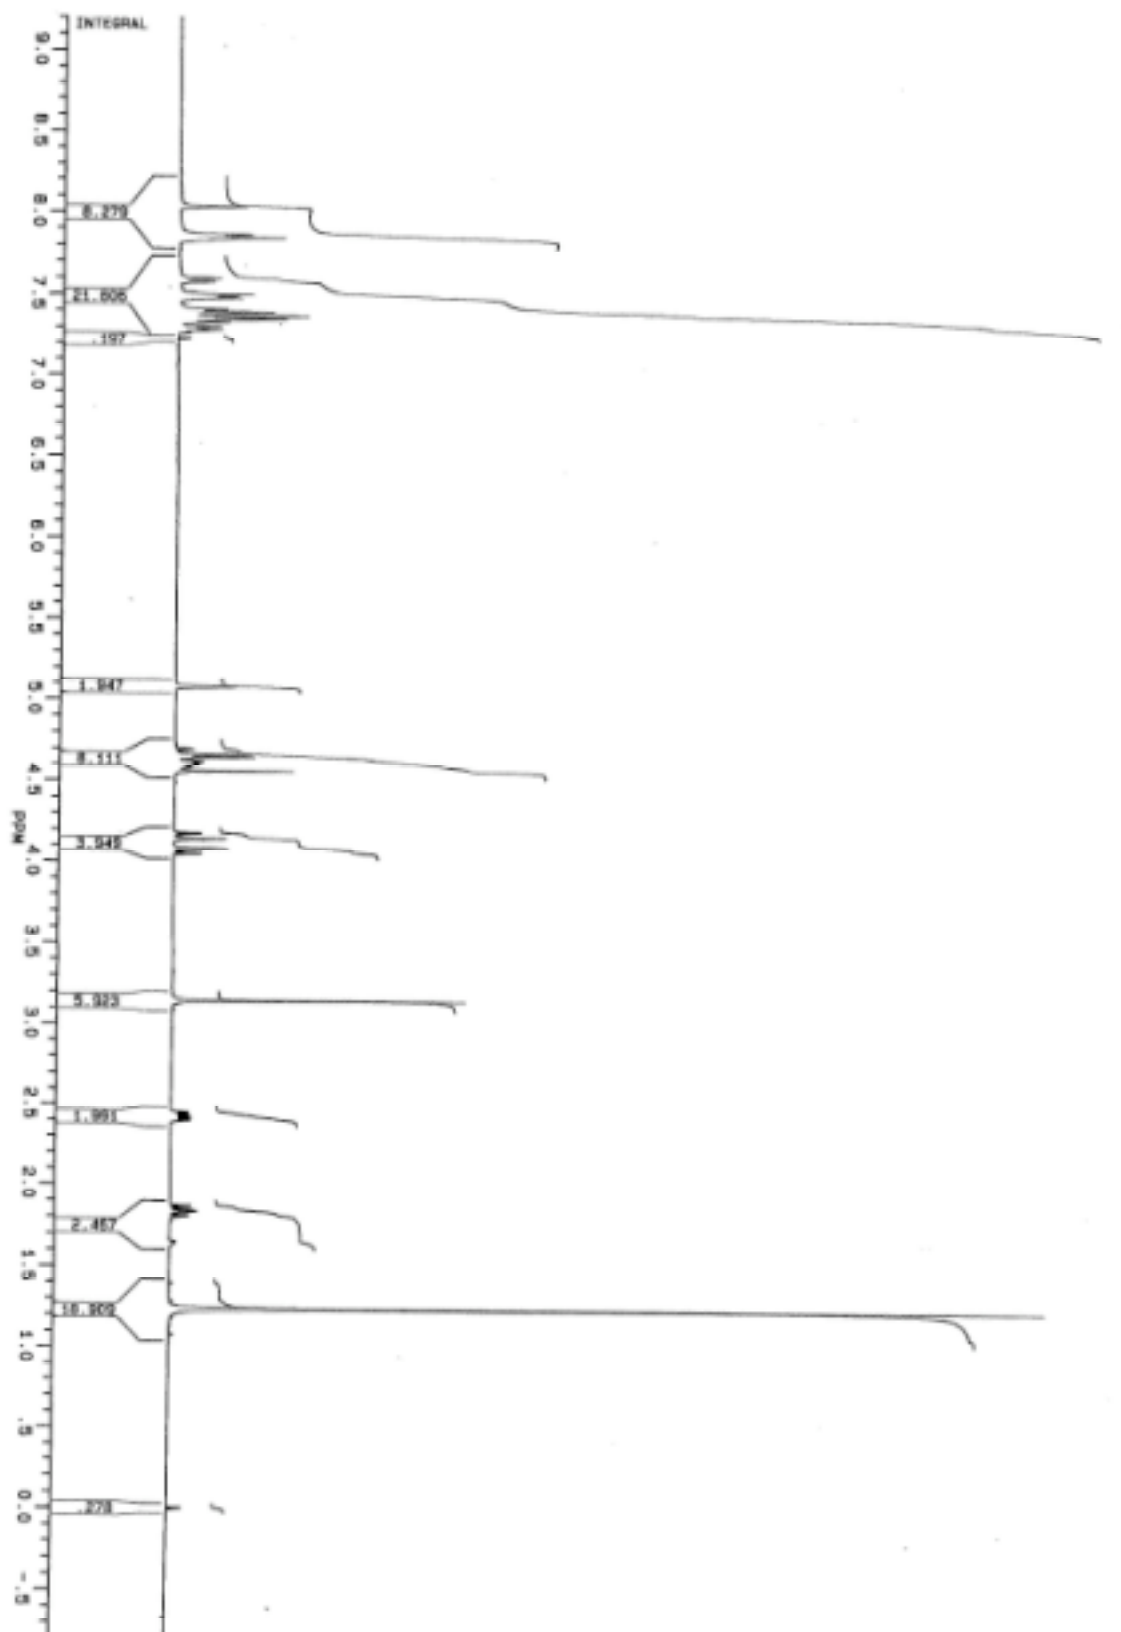

  
 MA0508.103  
 AU P800:  
 X02 AU  
 DATE 14-3-1  
 TIME 2:35  
 SE 400.134  
 SF0 400.130  
 SY 230.0  
 O1 6697.559  
 S1 32768  
 T0 32768  
 SW 8064.516  
 HZ/P1 .492  
 P1 0.0  
 R0 0.0  
 AU 2.032  
 N0 4  
 NS 10  
 TE 297  
 FM 10100  
 D2 4171.003  
 DP 63L P0  
 LB .300  
 GB 0.0  
 CX 35.00  
 CY 19.00  
 F1 0.200P  
 F2 -.800P  
 H1/CW 114.321  
 PPM/CW .266  
 SR 4409.35  
 O1 1.0000000  
 P0 4.33  
 R0A  
 RD 0.0  
 PM 0.0  
 DE 77.50  
 NS 16  
 DS 2

## Alcohol 9

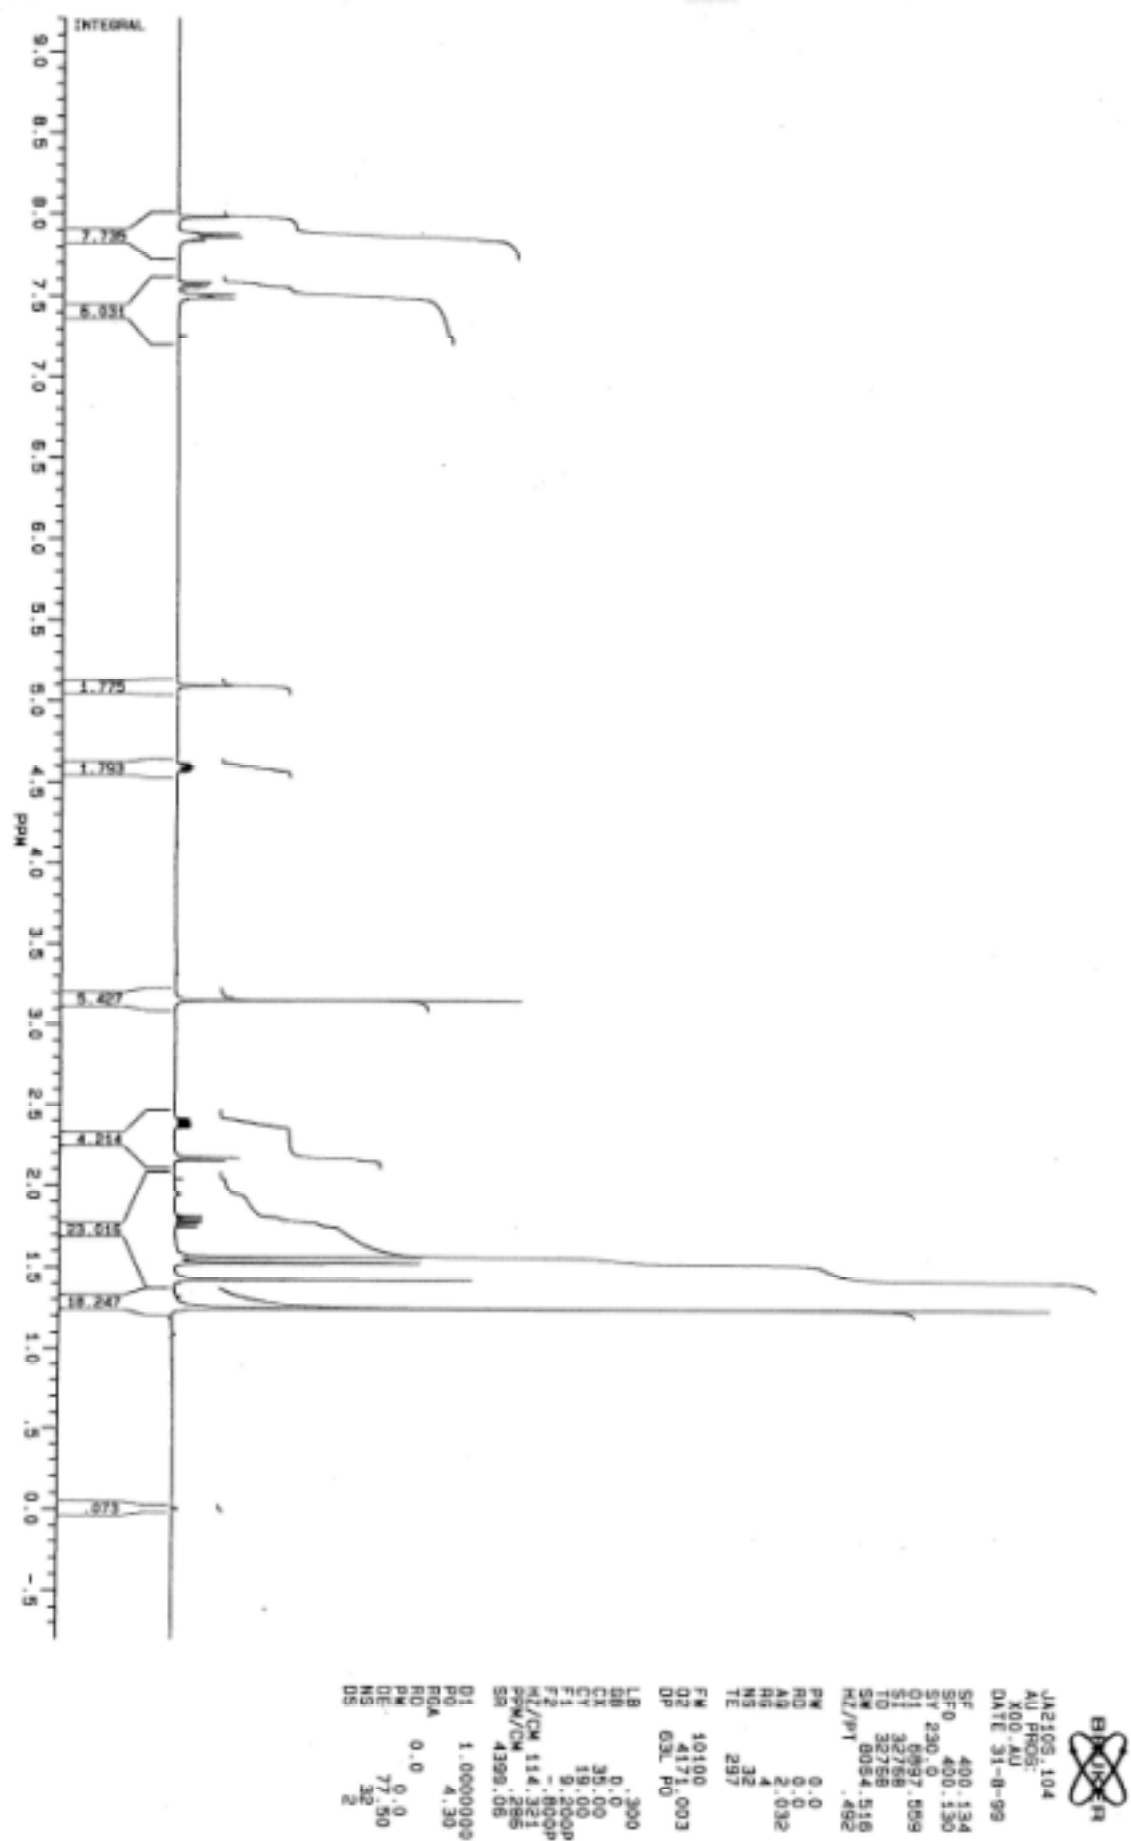



# Aldehyde 10

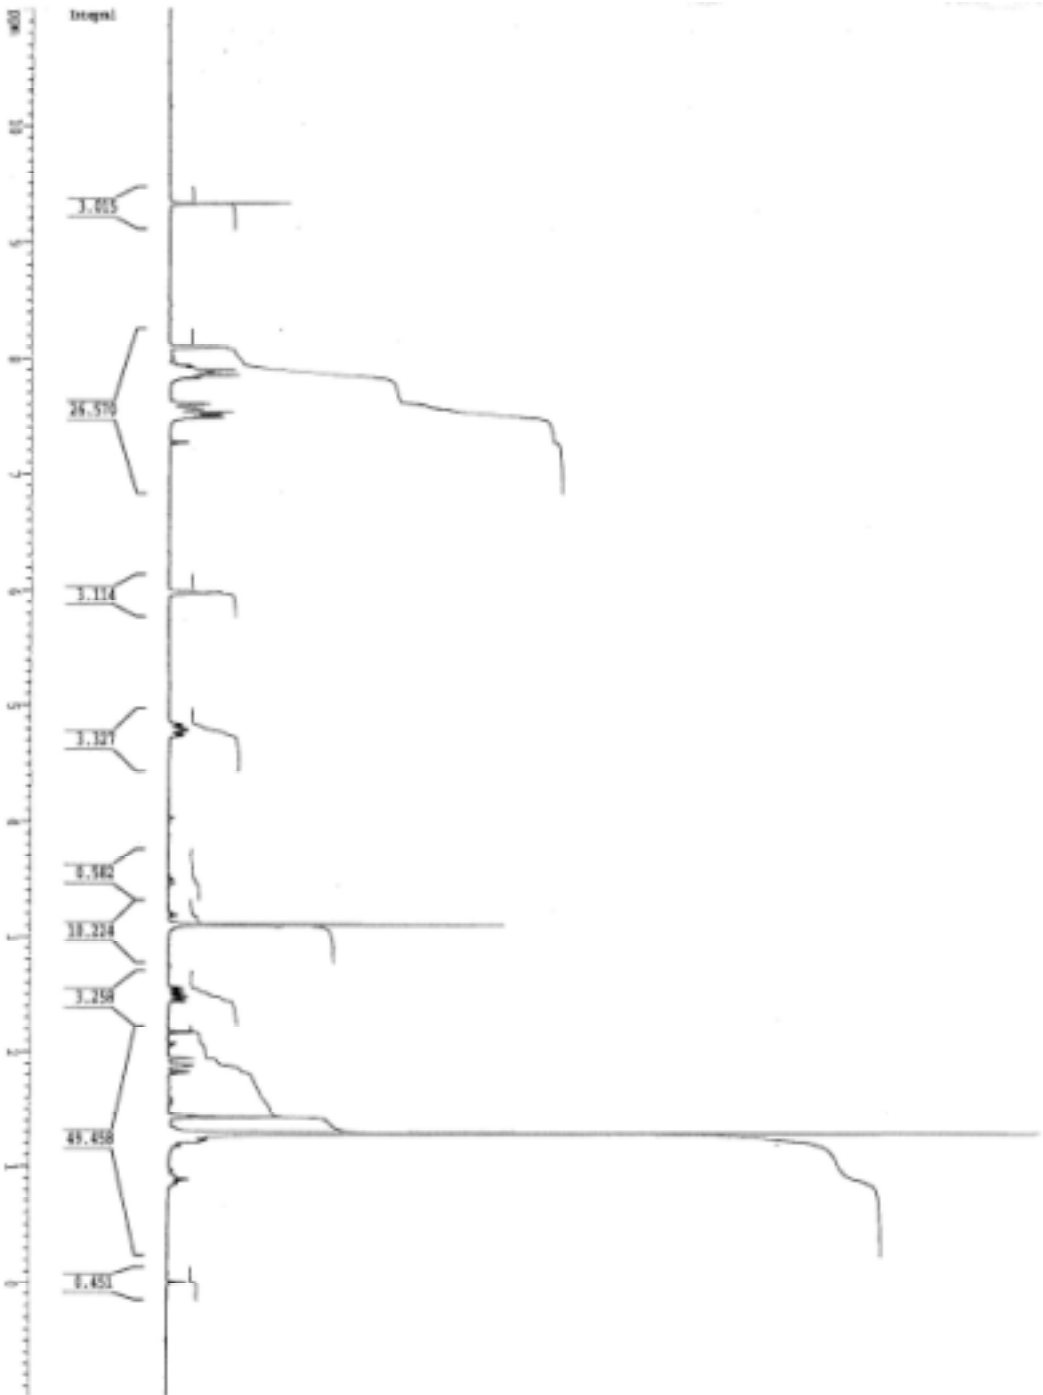

Current Data Parameters  
NAME: 2m10-2413  
EXPNO: 219  
PROCNO: 1

F2 - Acquisition Parameters  
Date\_: 10/01/10  
Time: 12.45  
INSTRUM: spect  
PROBHD: 5 mm QNP 1H  
PULPROG: zgpg  
TD: 65536  
SOLVENT: CHCl3  
NS: 12  
DS: 2  
SWH: 4139.873 Hz  
FIDRES: 0.124314 Hz  
AQ: 1.958424 sec  
RG: 2048  
SW: 120.800 MHz  
WDW: 9.00 usec  
SSB: 380.0 K  
GB: 1.0000000 sec

===== CHANNEL f1 =====  
NUC1: 1H  
P1: 9.50 usec  
PC1: -6.00 dB  
RFPO: 200.132259 MHz

F2 - Processing parameters  
SI: 32768  
SF: 200.130005 MHz  
WDW: HM  
SSB: 0  
LB: 0.30 Hz  
GB: 0  
PC: 1.20

1D 90deg pulse parameters  
CX: 50.00 cm  
P1P: 11.000 usec  
PI: 2281.43 Hz  
P2P: -1.000 usec  
PI2: -200.11 Hz  
PRGCM: 0.4000000000000000  
R2CM: 00.0000000000000000

# Alcohol 11

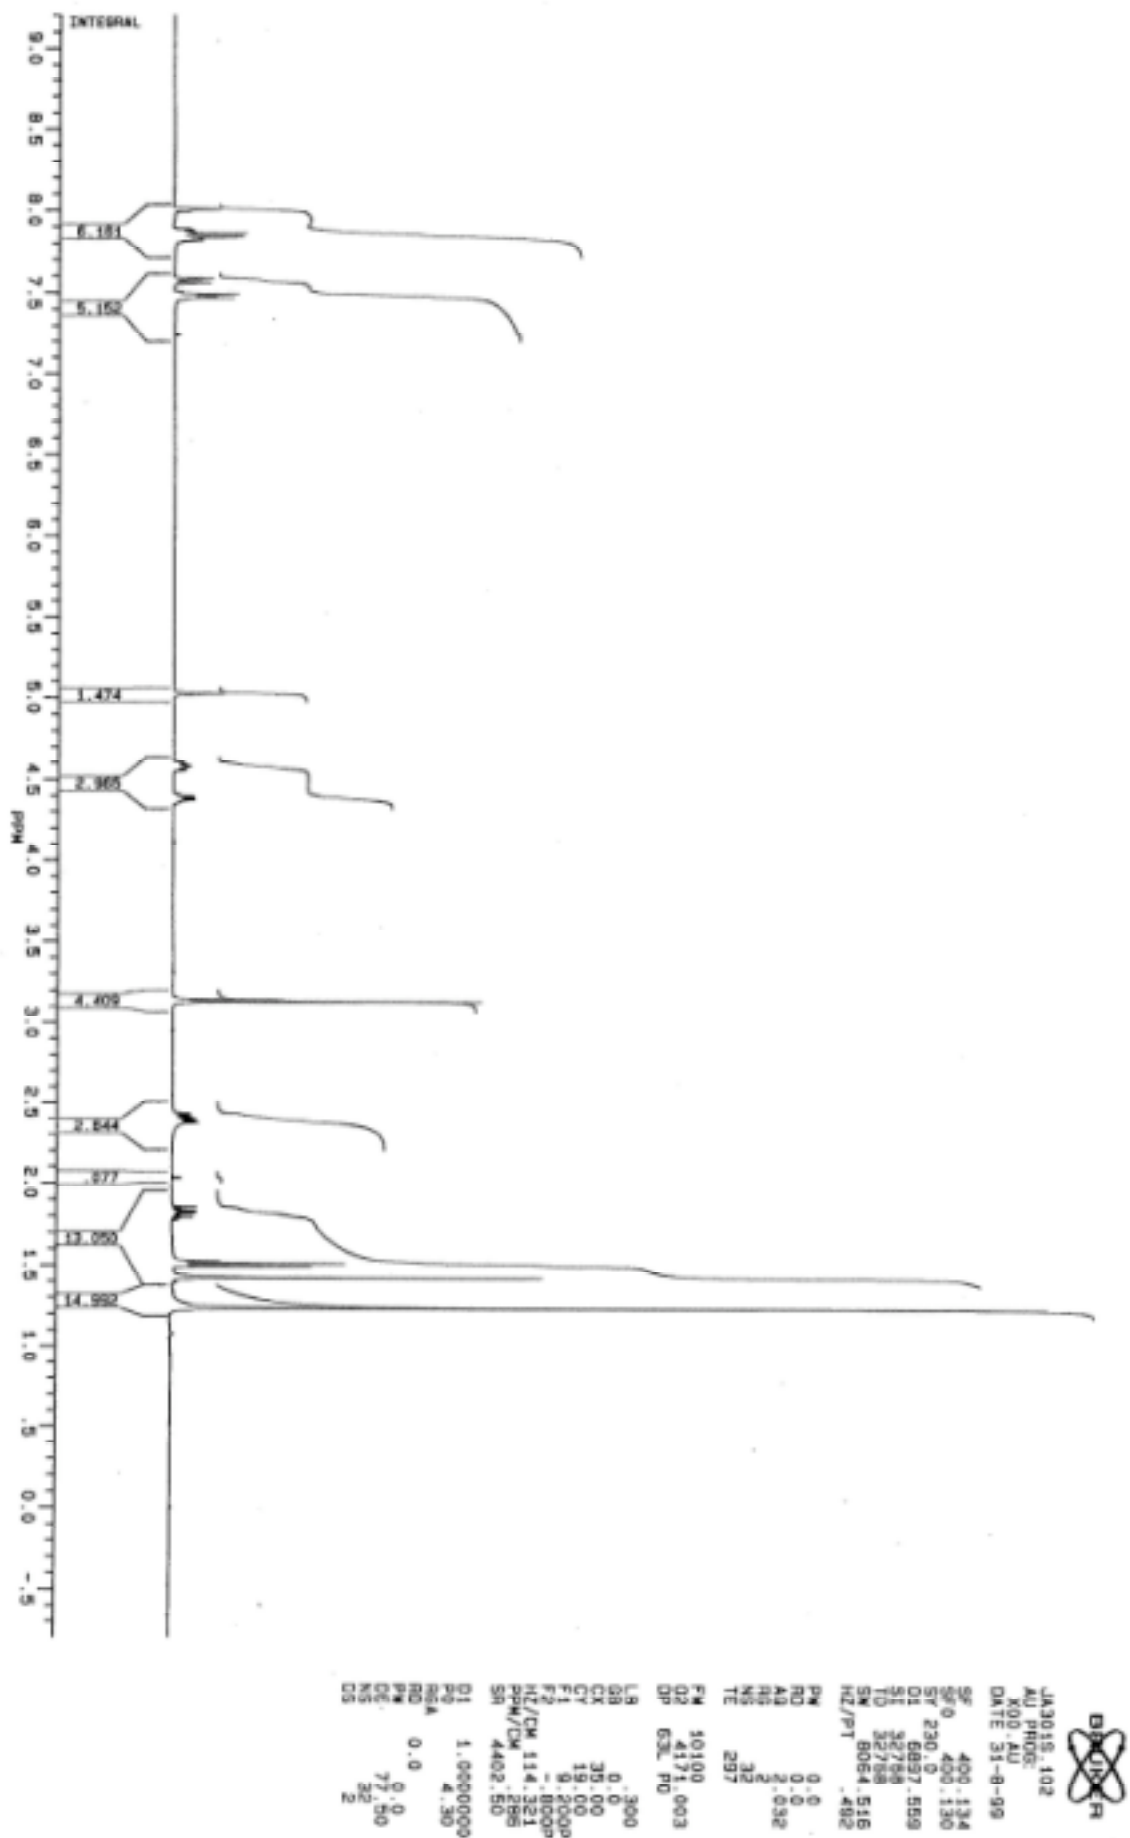

## Ketone 12

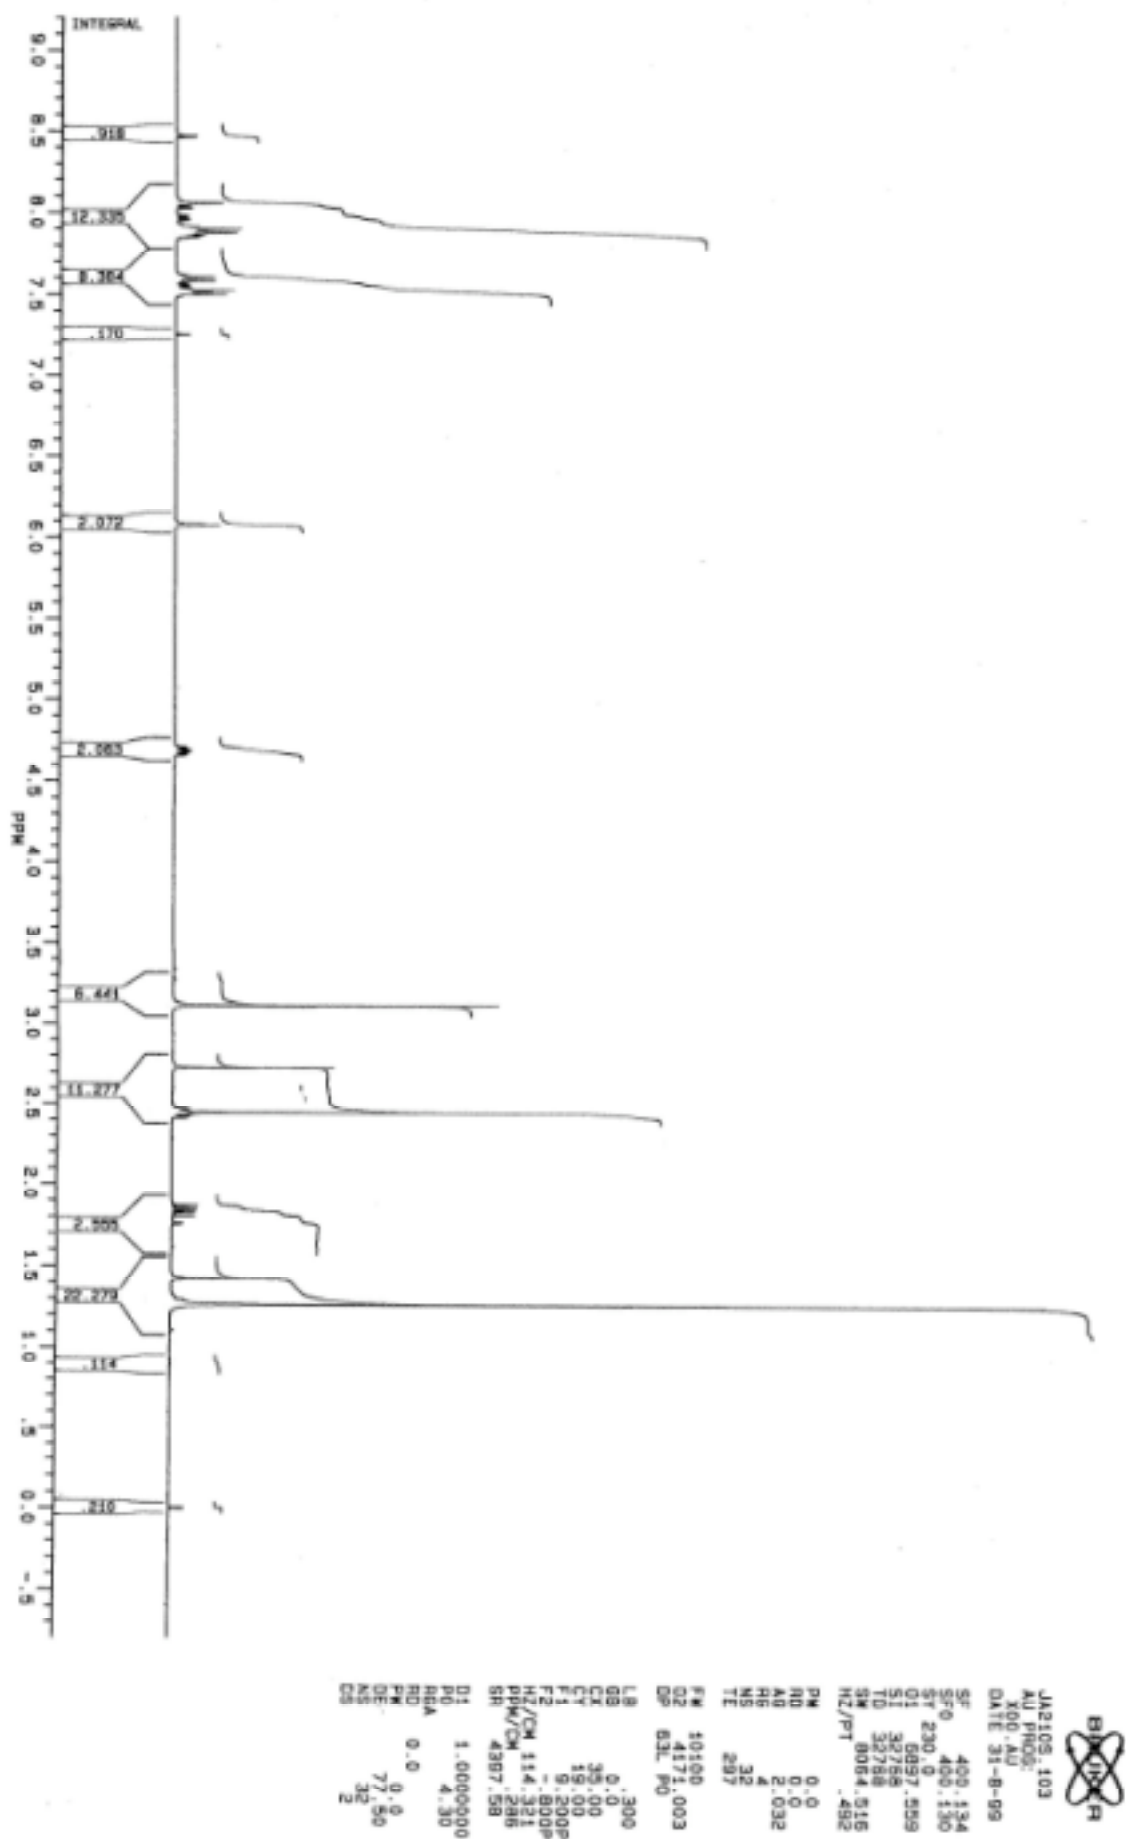

# Monofluoride 4d

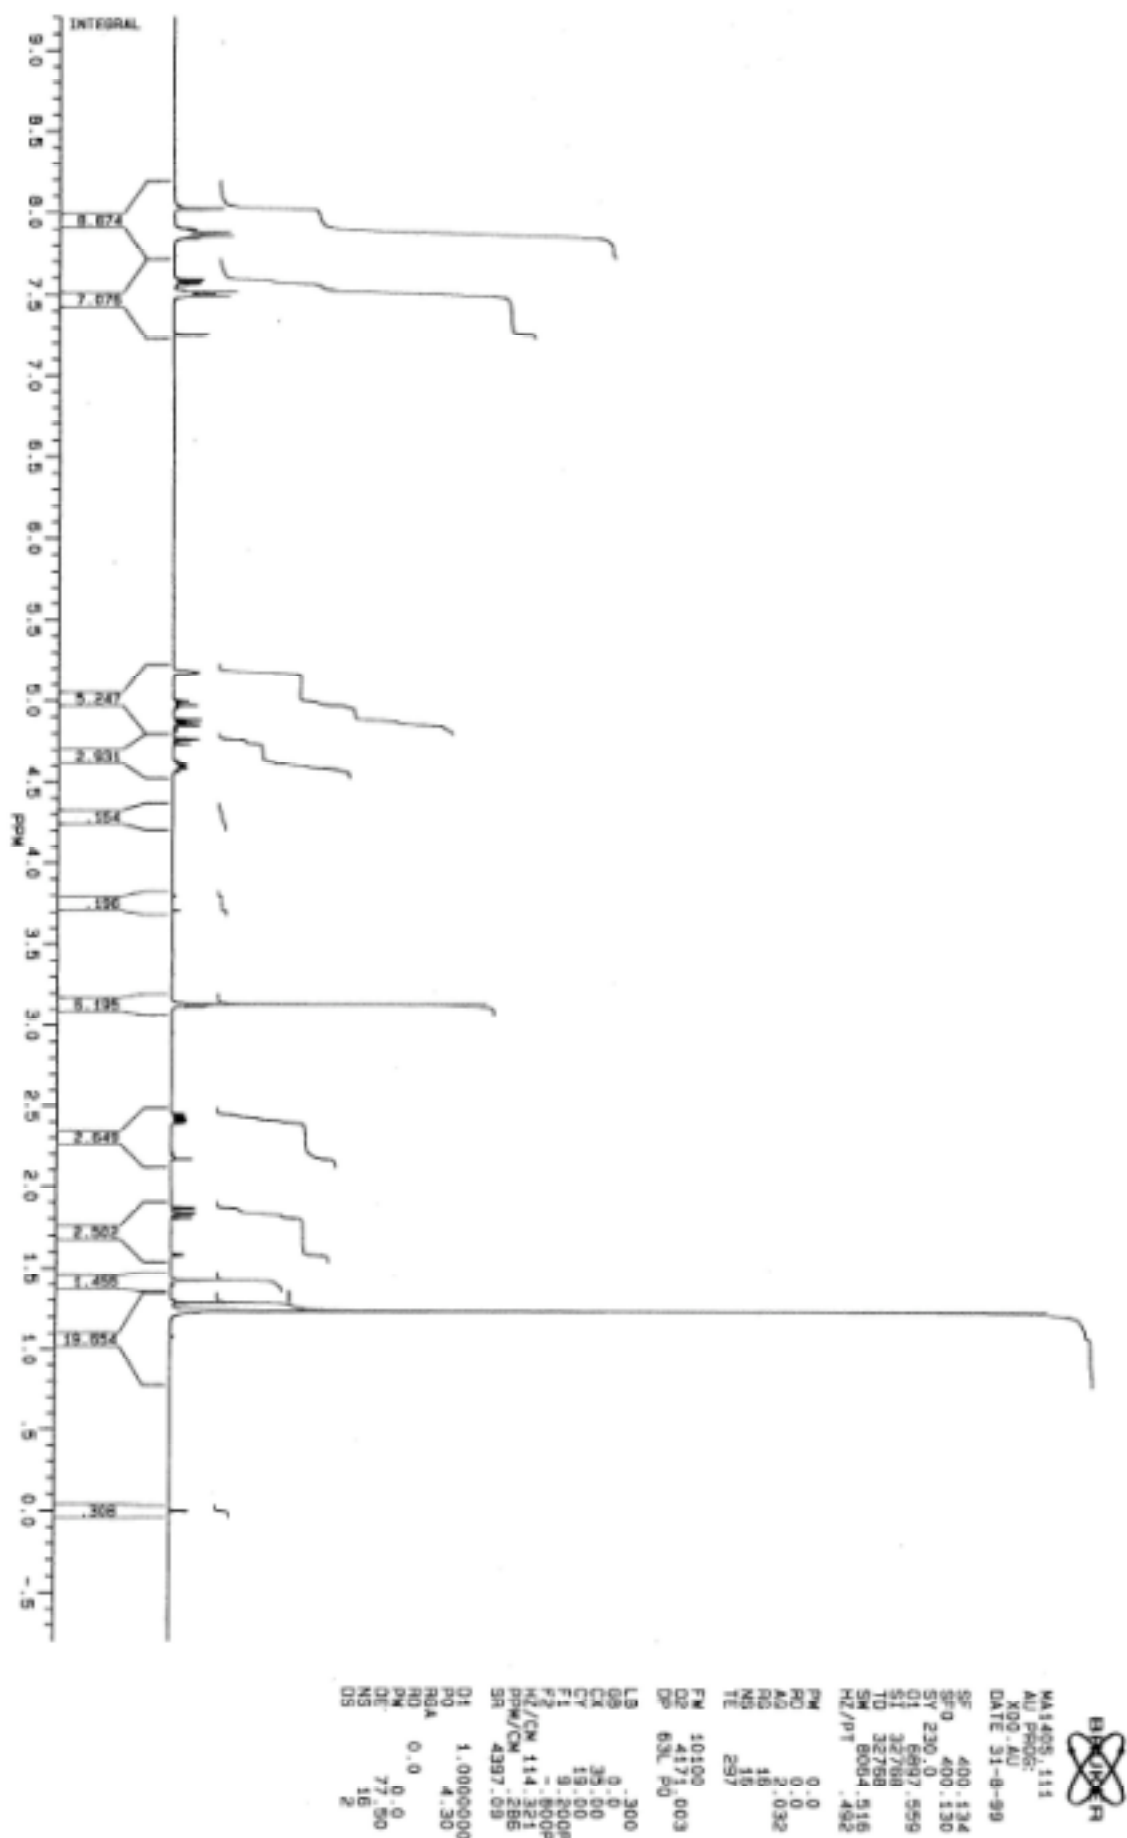

# Monofluoride 4e

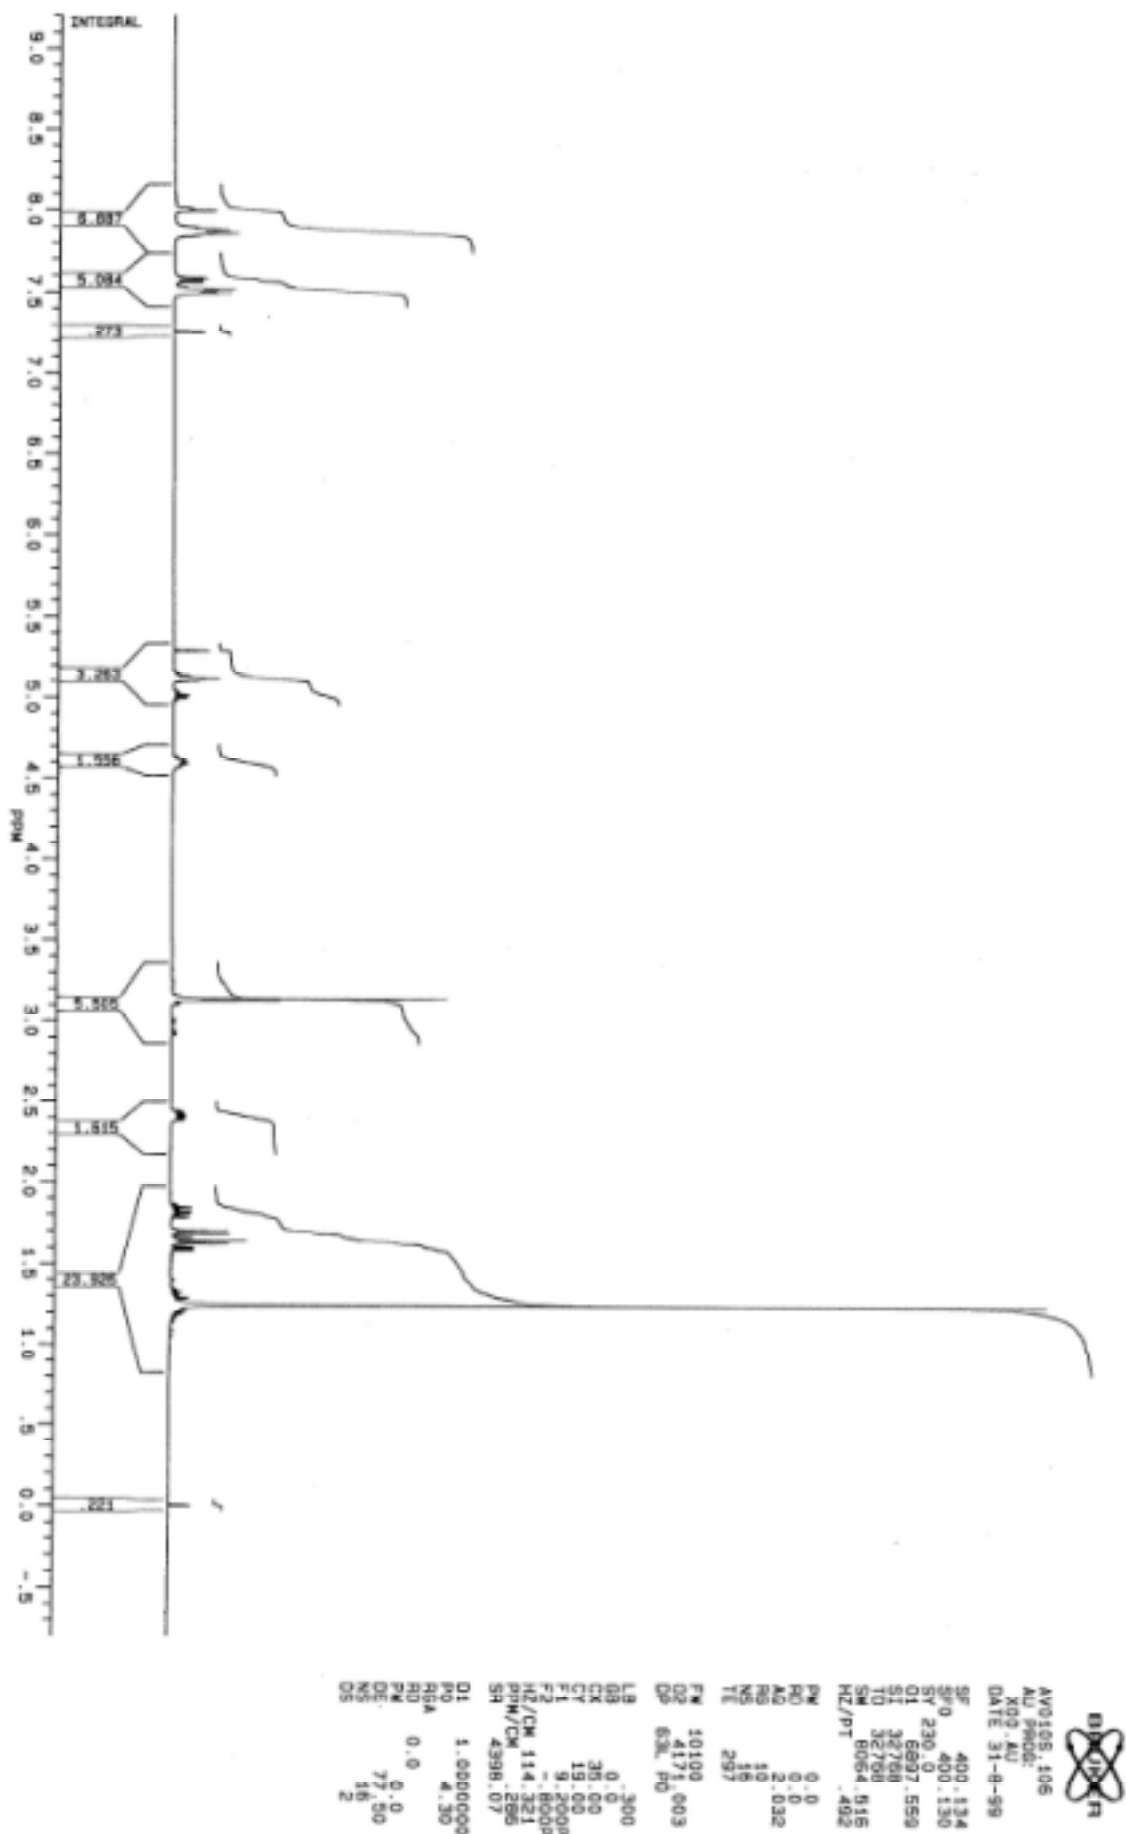

# Monofluoride 4f

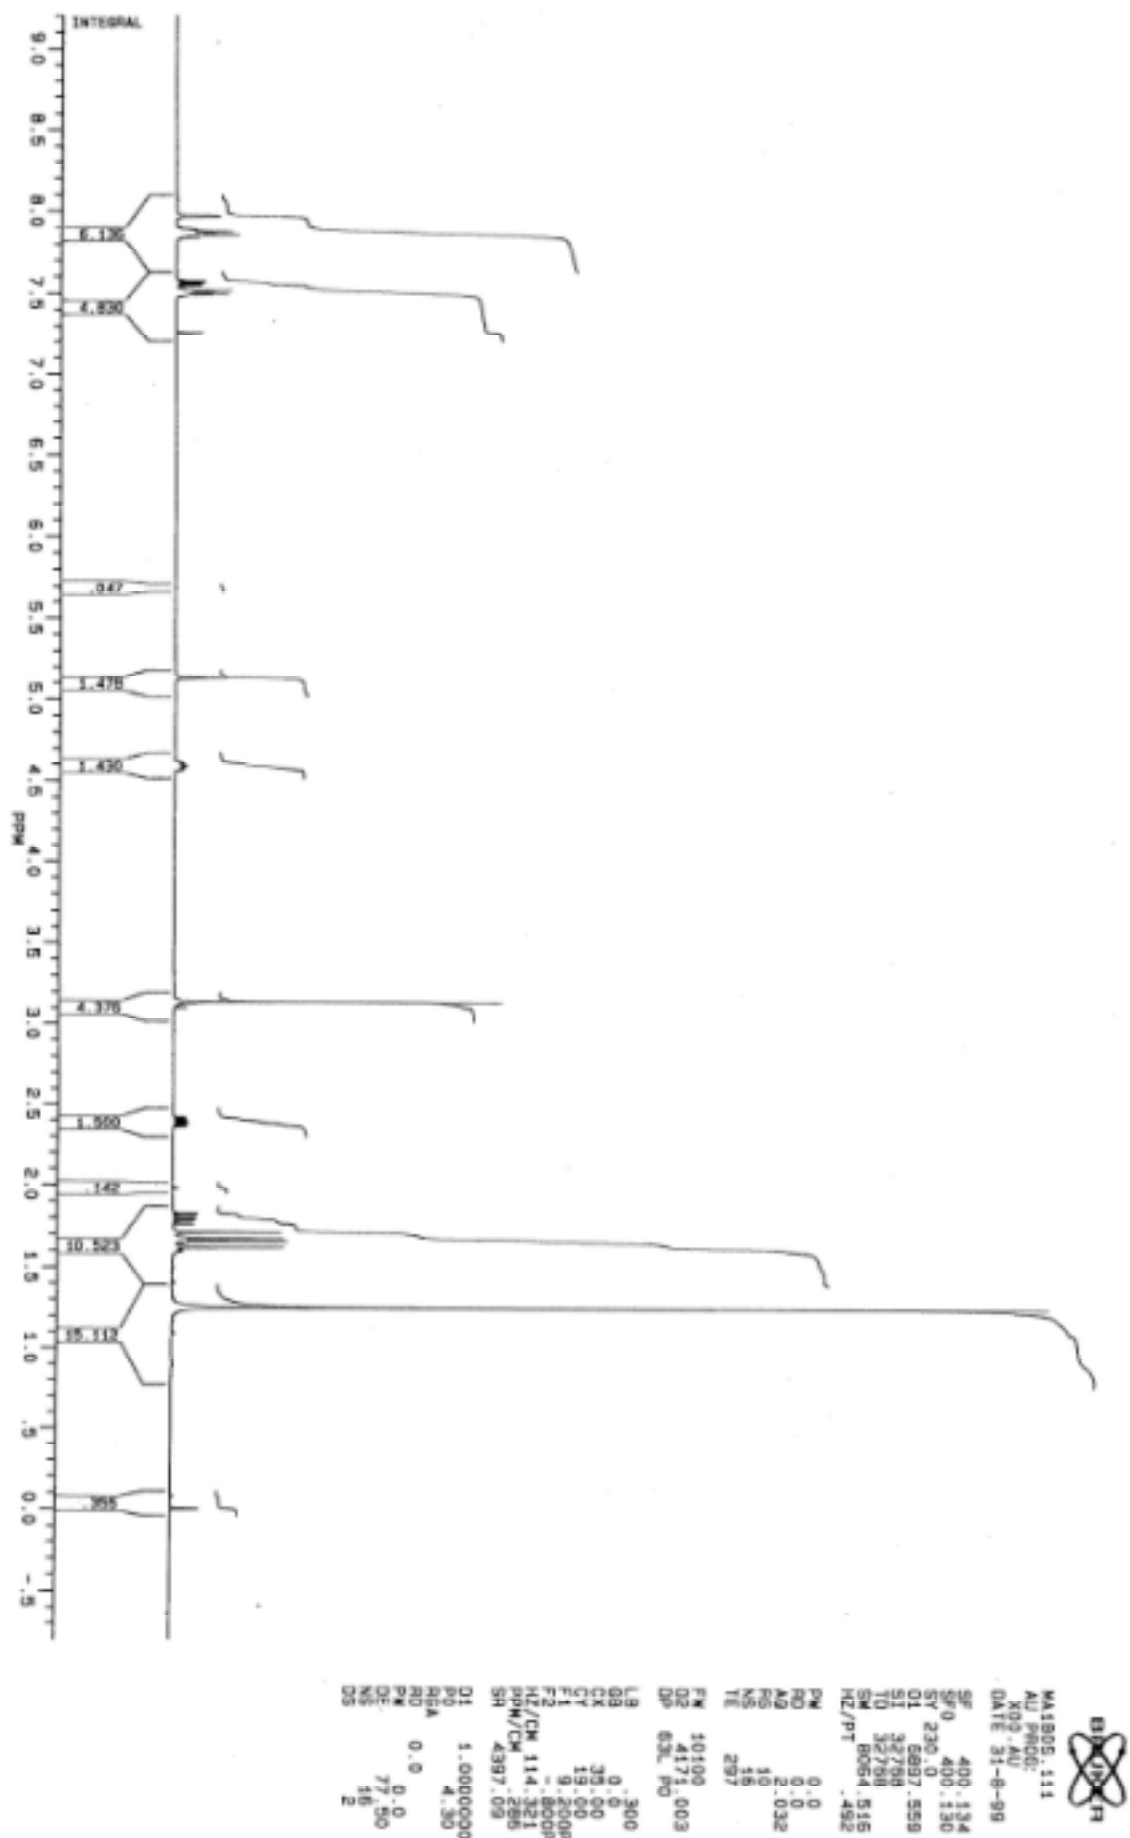

# Difluoride 4g

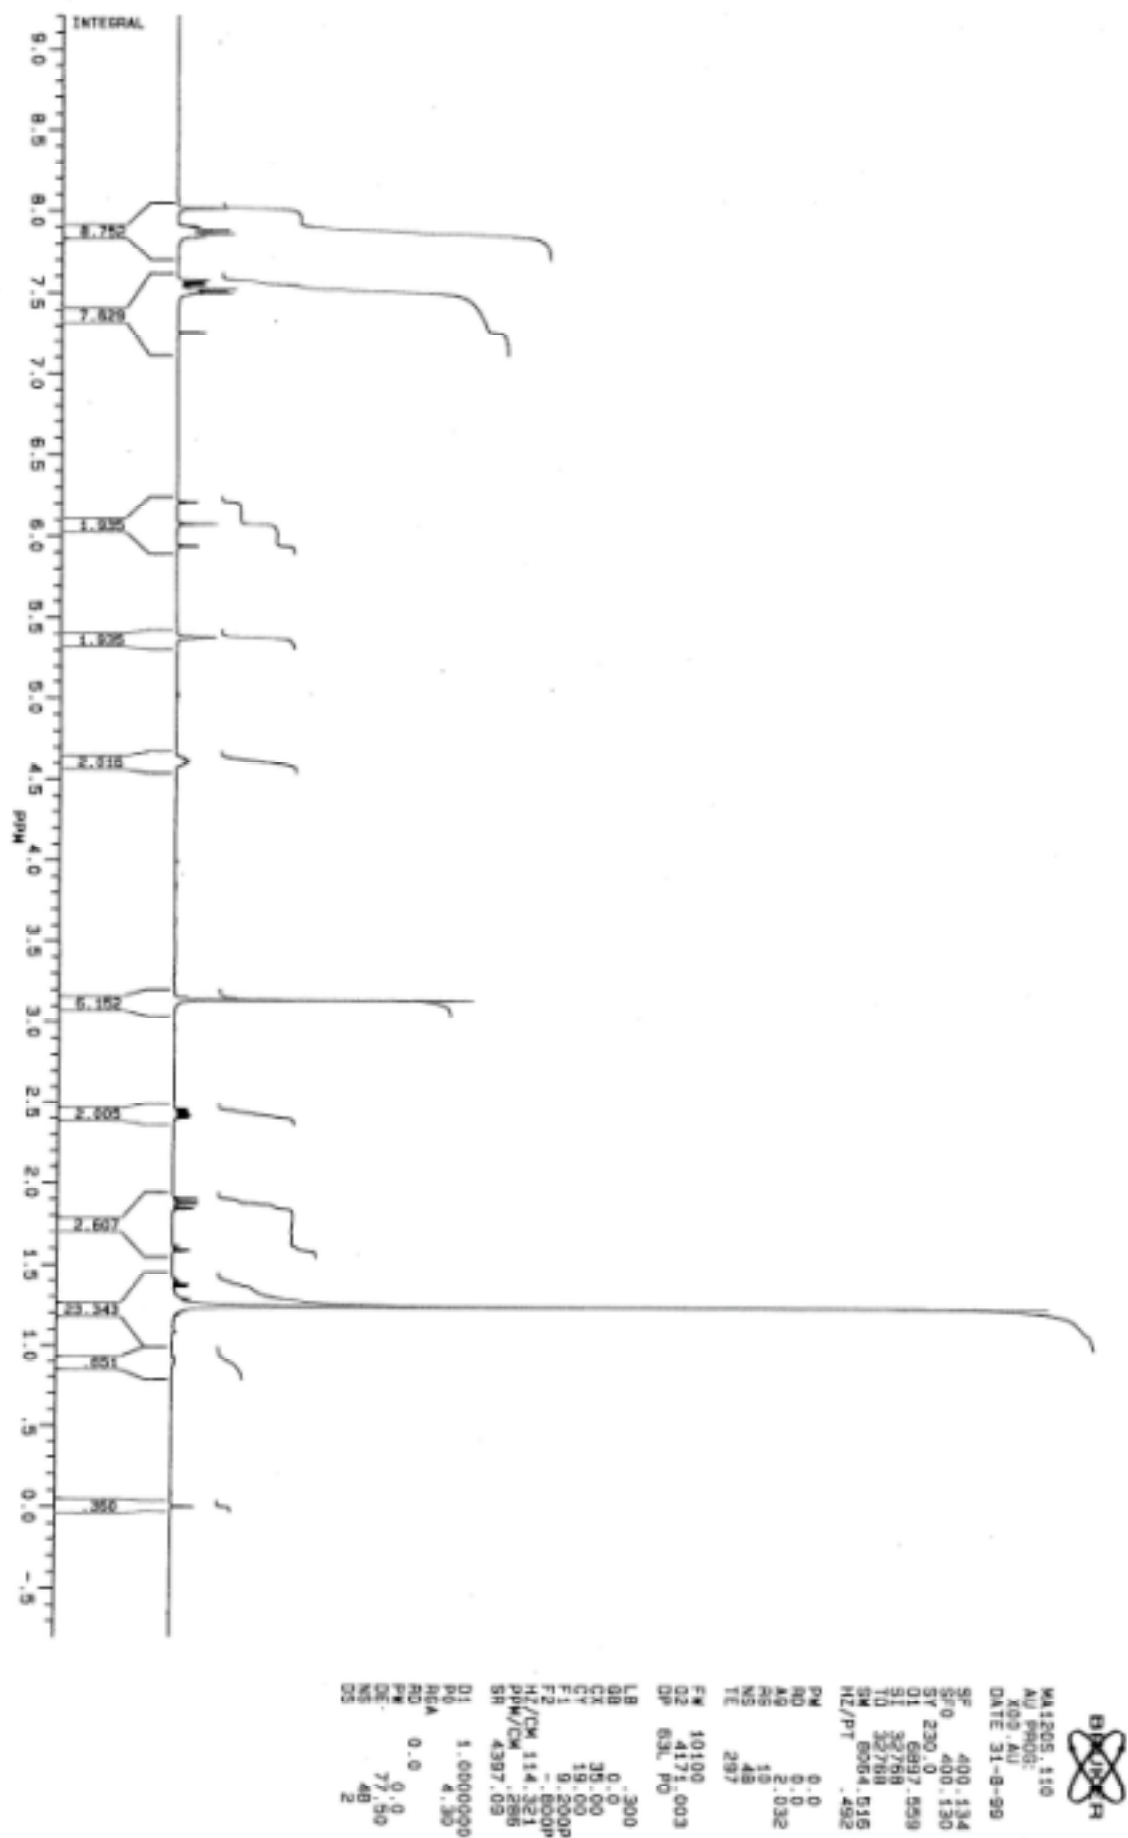

# Diffuoride 4h

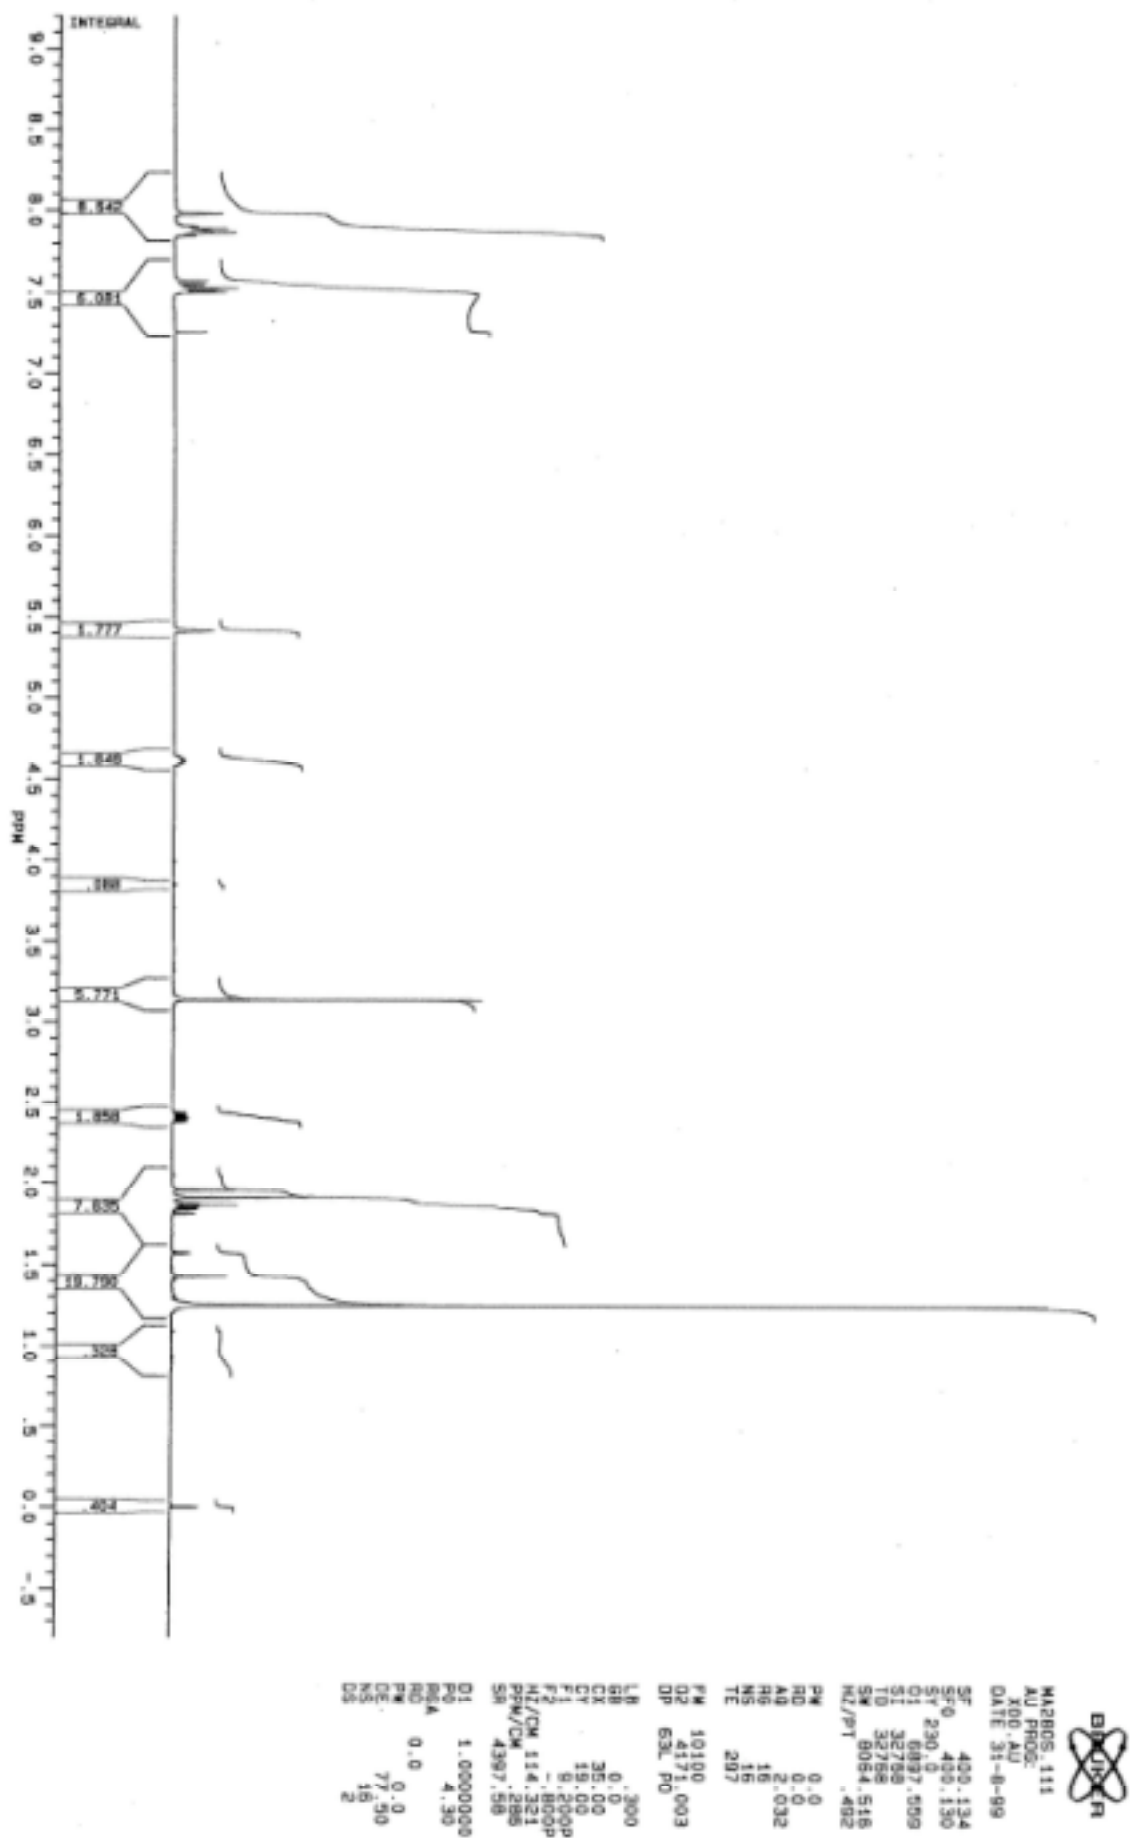



# Glycoside 5a

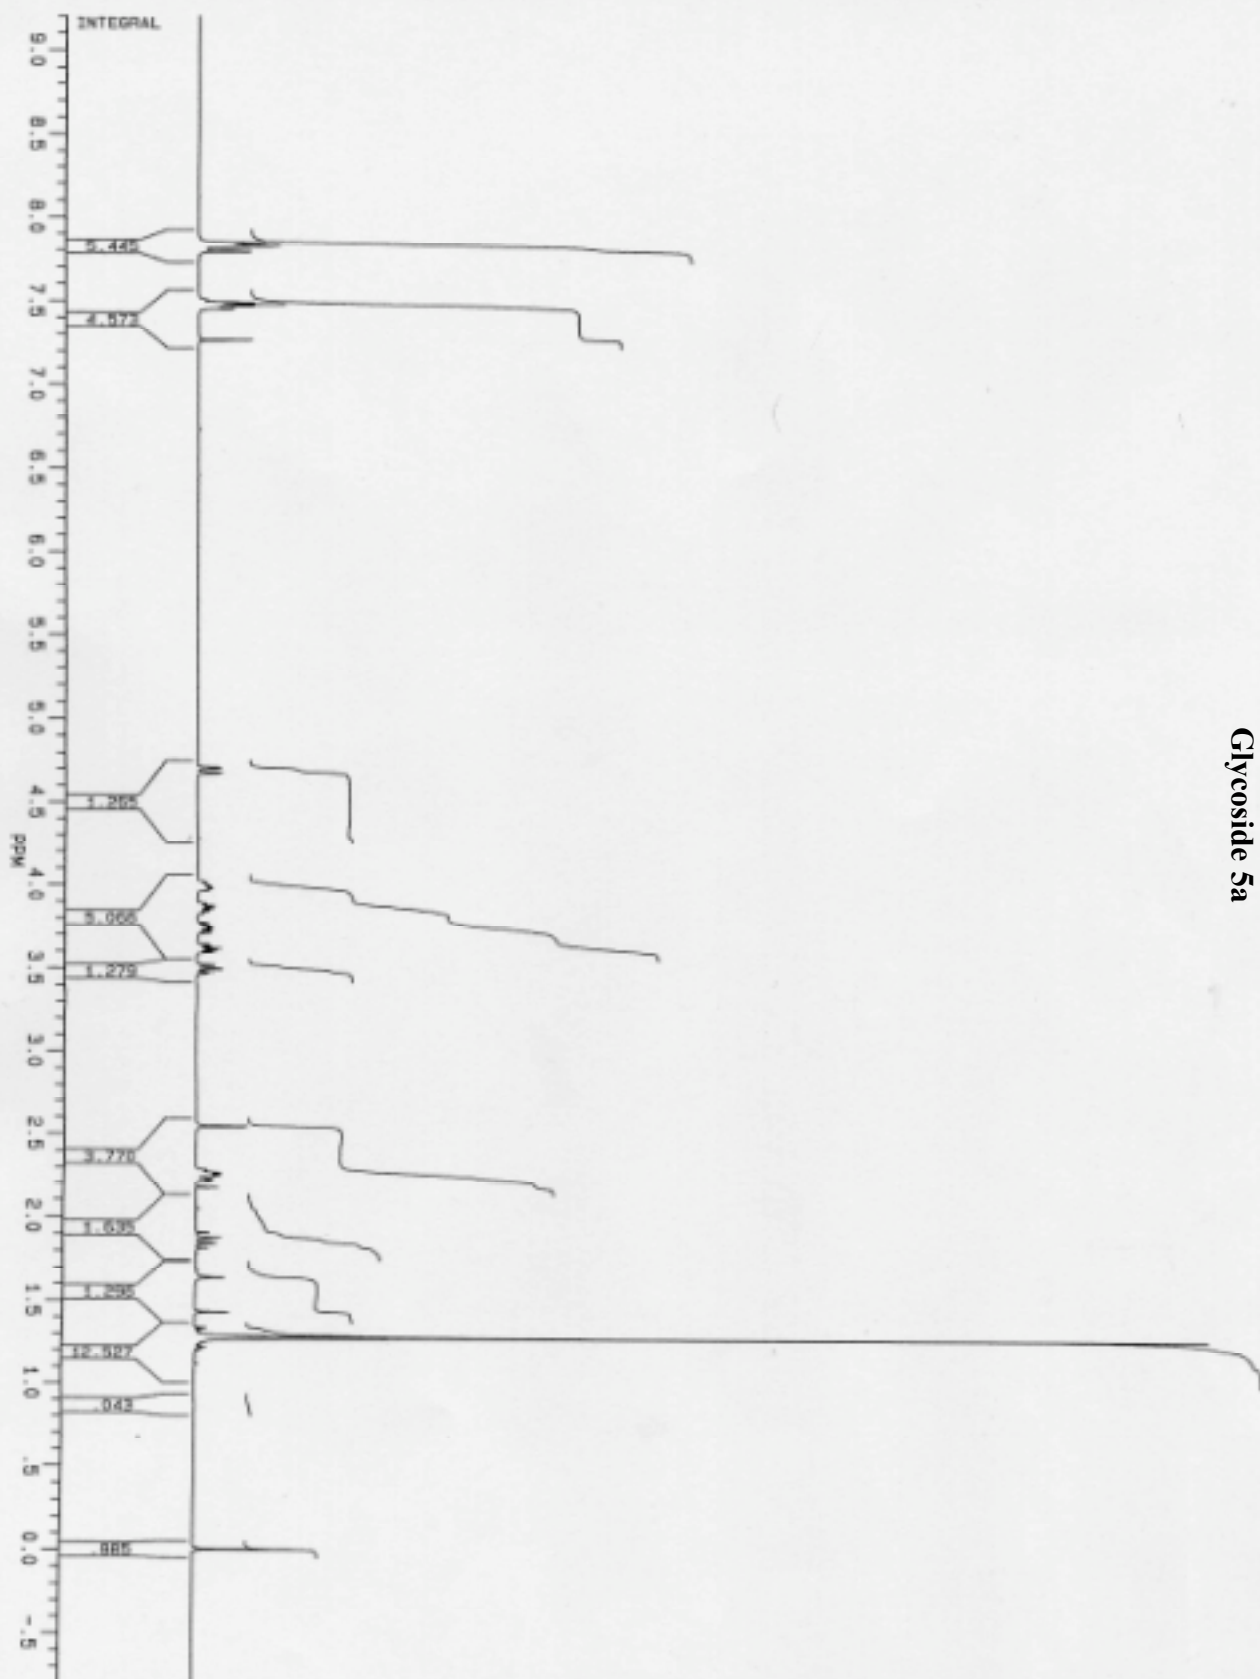


  
 J40625.101
   
 AU PROG:
   
 X00 AU
   
 DATE 31-8-99
   
 SF 400.134
   
 SFO 400.130
   
 SY 230.0
   
 O1 6897.559
   
 Y1 32768
   
 T0 32768
   
 SM 8064.515
   
 HZ/PT .492
   
 PM 0.0
   
 RD 0.0
   
 AG 2.032
   
 RG 40
   
 NS 16
   
 TE 297
   
 FM 10100
   
 D2 4171.003
   
 DP 63L PO
   
 LB -300
   
 GB 0.0
   
 CX 38.00
   
 CY 19.00
   
 F1 9.200P
   
 F2 -8.00P
   
 HZ/CW 114.321
   
 RPM/CW 4395.12
   
 SR 4395.12
   
 D1 1.0000000
   
 P0 4.30
   
 RQA
   
 RD 0.0
   
 PW 0.0
   
 DE 77.50
   
 NS 16
   
 DS 2

# Glycoside 8a

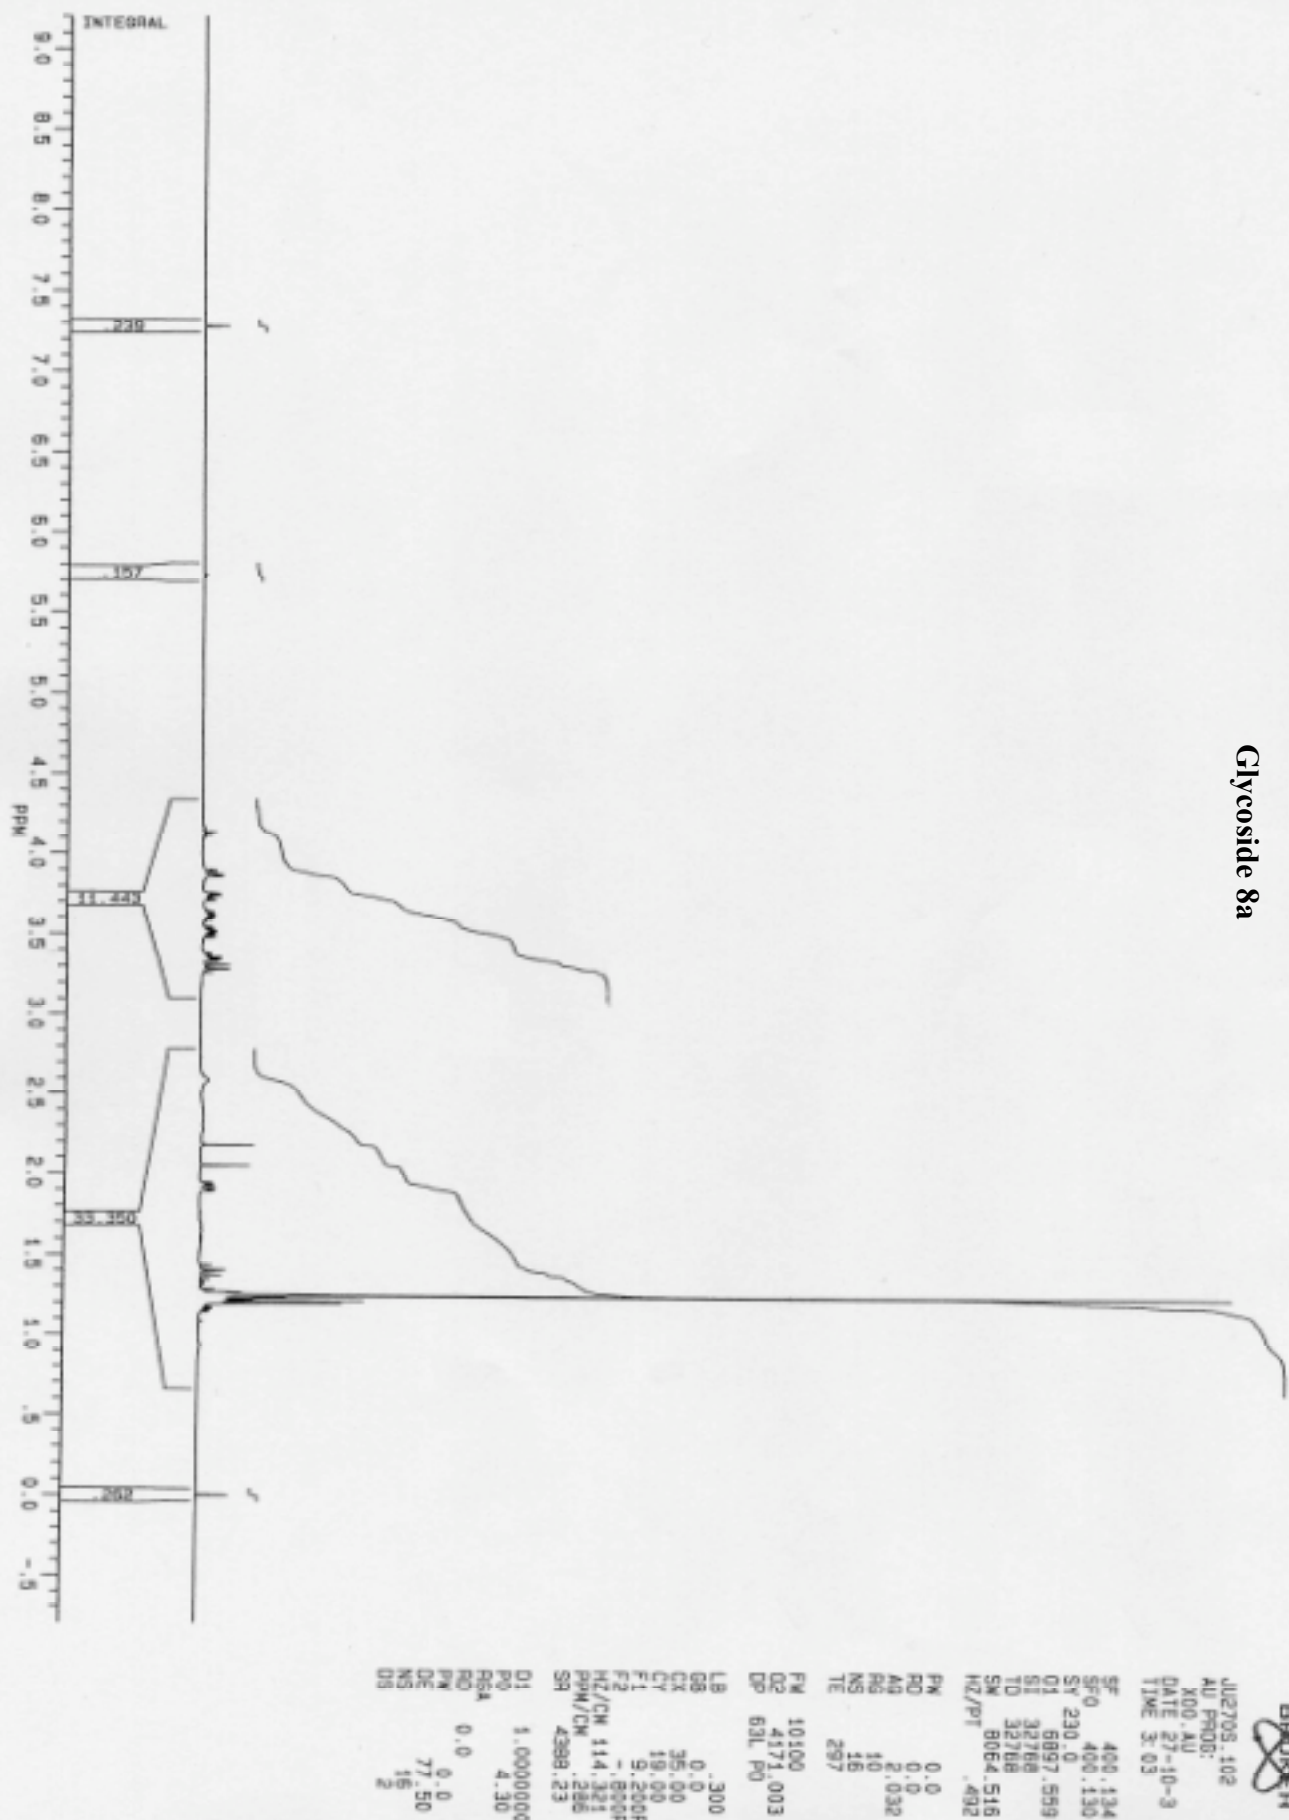

# Glycoside 5c

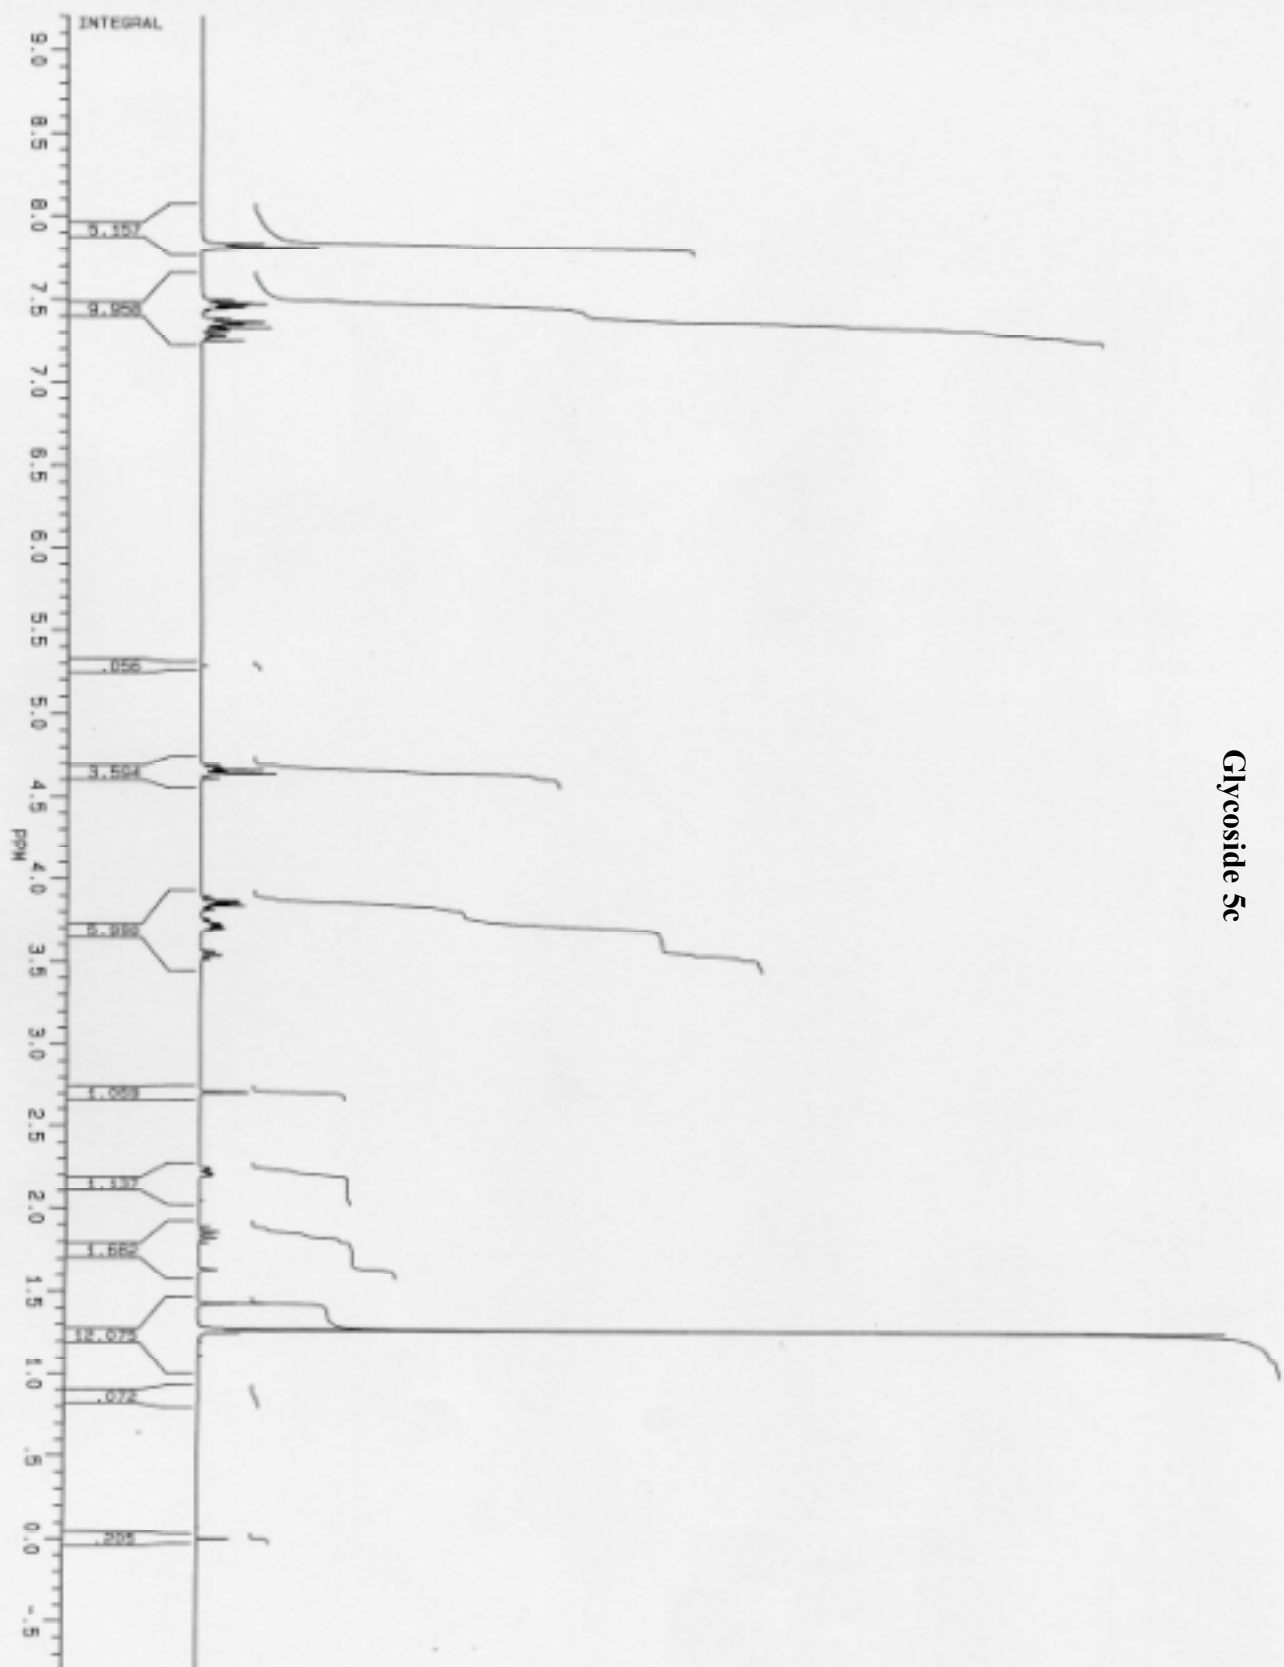

MA2505.107  
 AU PROG:  
 X25 AU  
 DATE 3-4-1  
 TIME 5:06  
 SF 400.134  
 SF0 400.130  
 SY 230.0  
 O1 6897.559  
 Y1 32769  
 T0 32769  
 SM 8064.516  
 HZ/PT .492  
 PM 0.0  
 RD 0.0  
 AD 2.032  
 RS 10  
 NS 16  
 TE 297  
 FM 10100  
 D2 4171.003  
 DP 63L PO  
 LB .300  
 GB 0.0  
 CX 35.00  
 CY 19.00  
 F1 9.200P  
 F2 -800P  
 HZ/CW 114.821  
 PPM/CW .295  
 SR 4399.55  
 D1 1.0000000  
 P0 4.30  
 R0A 0.0  
 RD 0.0  
 PW 0.0  
 DE 77.90  
 NS 16  
 DS 2

# Glycoside 5d

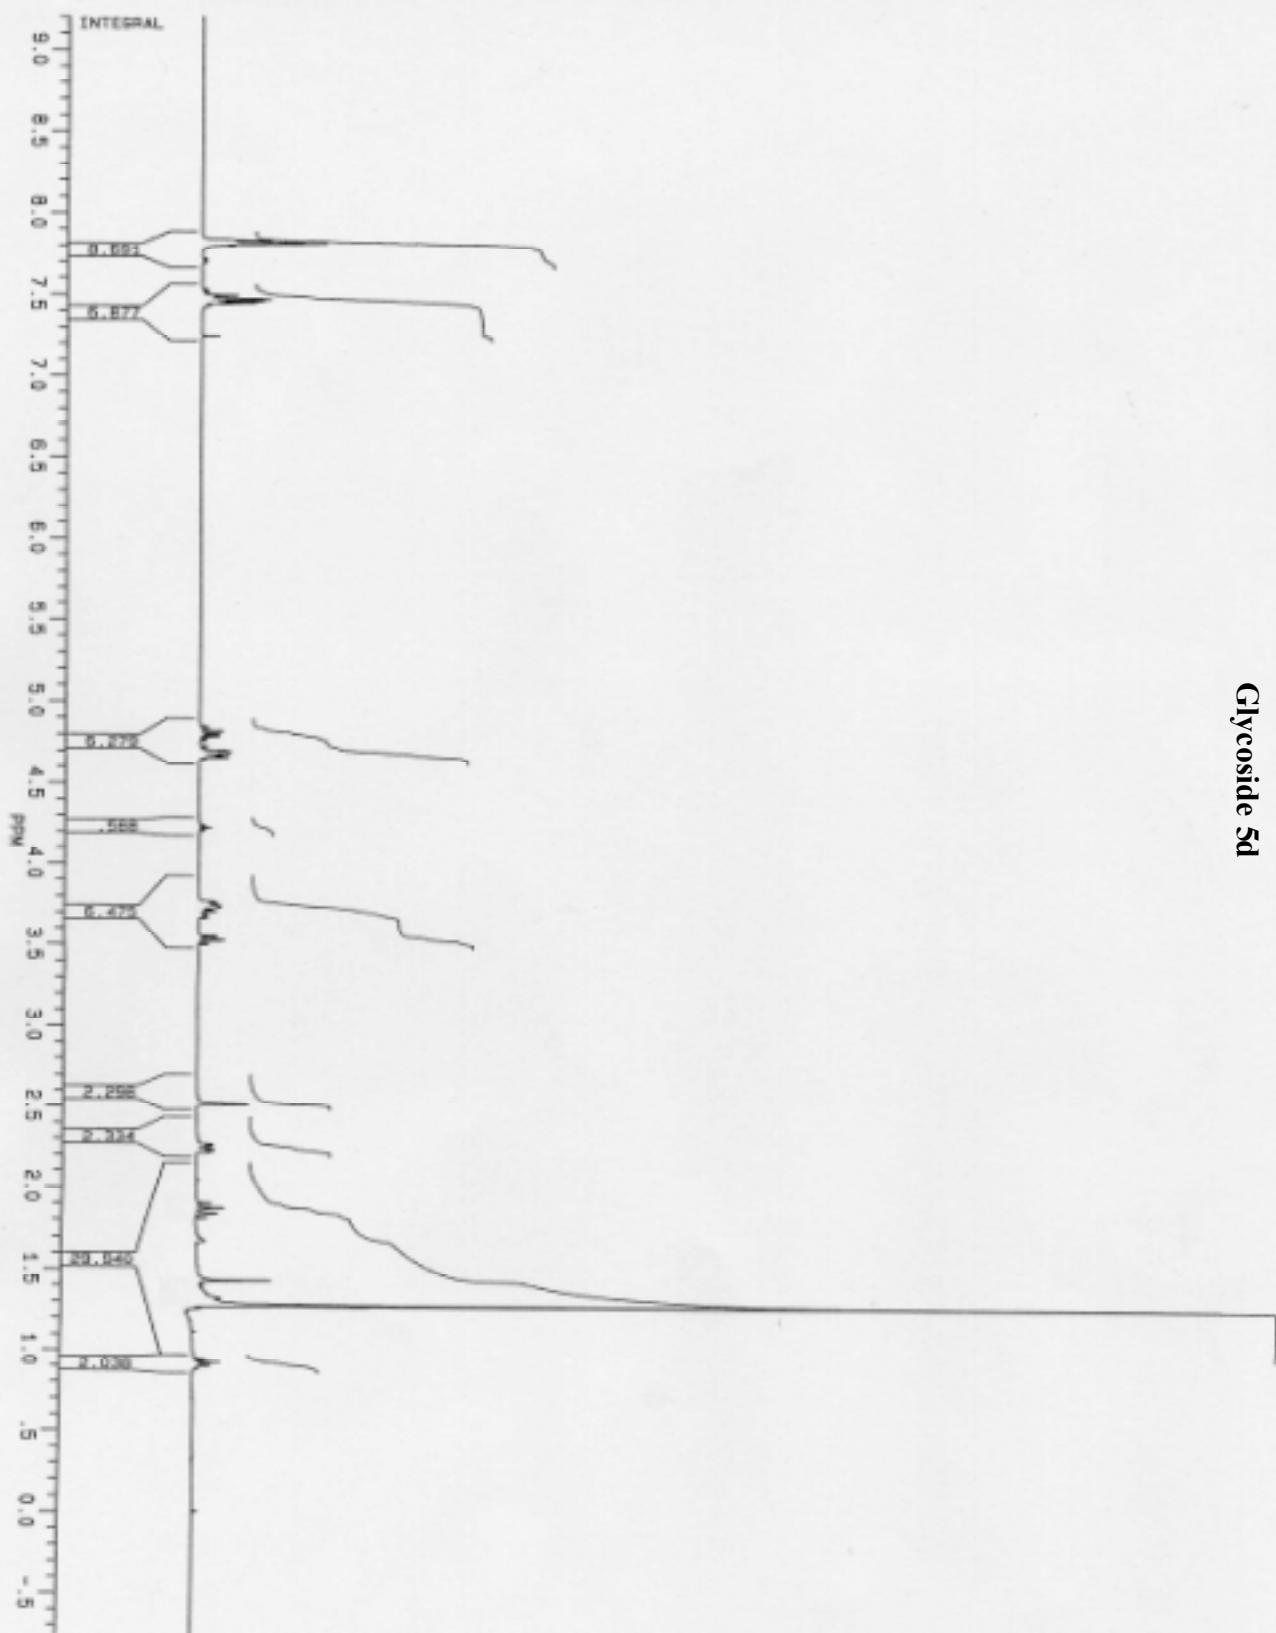

 MA2005.109  
 AU Prog: X00 AU  
 DATE 31-8-99  
 SF 400.134  
 SFO 400.130  
 ST 230.0  
 O1 6897.559  
 S1 32768  
 TD 32768  
 SM 8064.516  
 HL/PT .492  
 PM 0.0  
 RD 0.0  
 AQ 2.032  
 RG 4  
 NS 32  
 TE 297  
 F# 10100  
 Q2 4171.003  
 DP 63L P0  
 LB .300  
 GB 0.0  
 CX 35.00  
 CY 18.00  
 F1 9.200P  
 F2 .800P  
 H2/CW 114.321  
 PPM/CW 286  
 SR 4482.50  
 D1 1.0000000  
 P0 4.30  
 RQA  
 RD 0.0  
 PM 0.0  
 DE 77.50  
 NS 32  
 DS 2

# Glycoside 5c

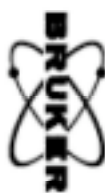

Current Data Parameters  
NAME Oct01-2004  
EXPNO 109  
PROCNO 1

F1 - Acquisition Parameters  
Date\_ 20041001  
Time 17.05  
INSTRUM spect  
PROBHD 5 mm QNP 1H/13  
PULPROG zgpg30  
TO 65316  
SOLVENT CHCL3  
NS 16  
DS 2  
SWH 6278.146 Hz  
FIDRES 0.126314 Hz  
AQ 3.258424 sec  
RG 64  
DA 60.401 use  
DE 18.00 use  
TE 298.2 K  
D1 1.6000000 sec  
TOS 1

===== CHANNEL F1 =====  
NUC1 13  
P1 18.00 use  
PL1 -4.00 dB  
SFO1 400.1324712 MHz  
  
F2 - Processing parameters  
SI 32768  
SF 400.1302164 MHz  
WDW EM  
SSB 0  
LB 0.35 Hz  
GB 0  
PC 1.00

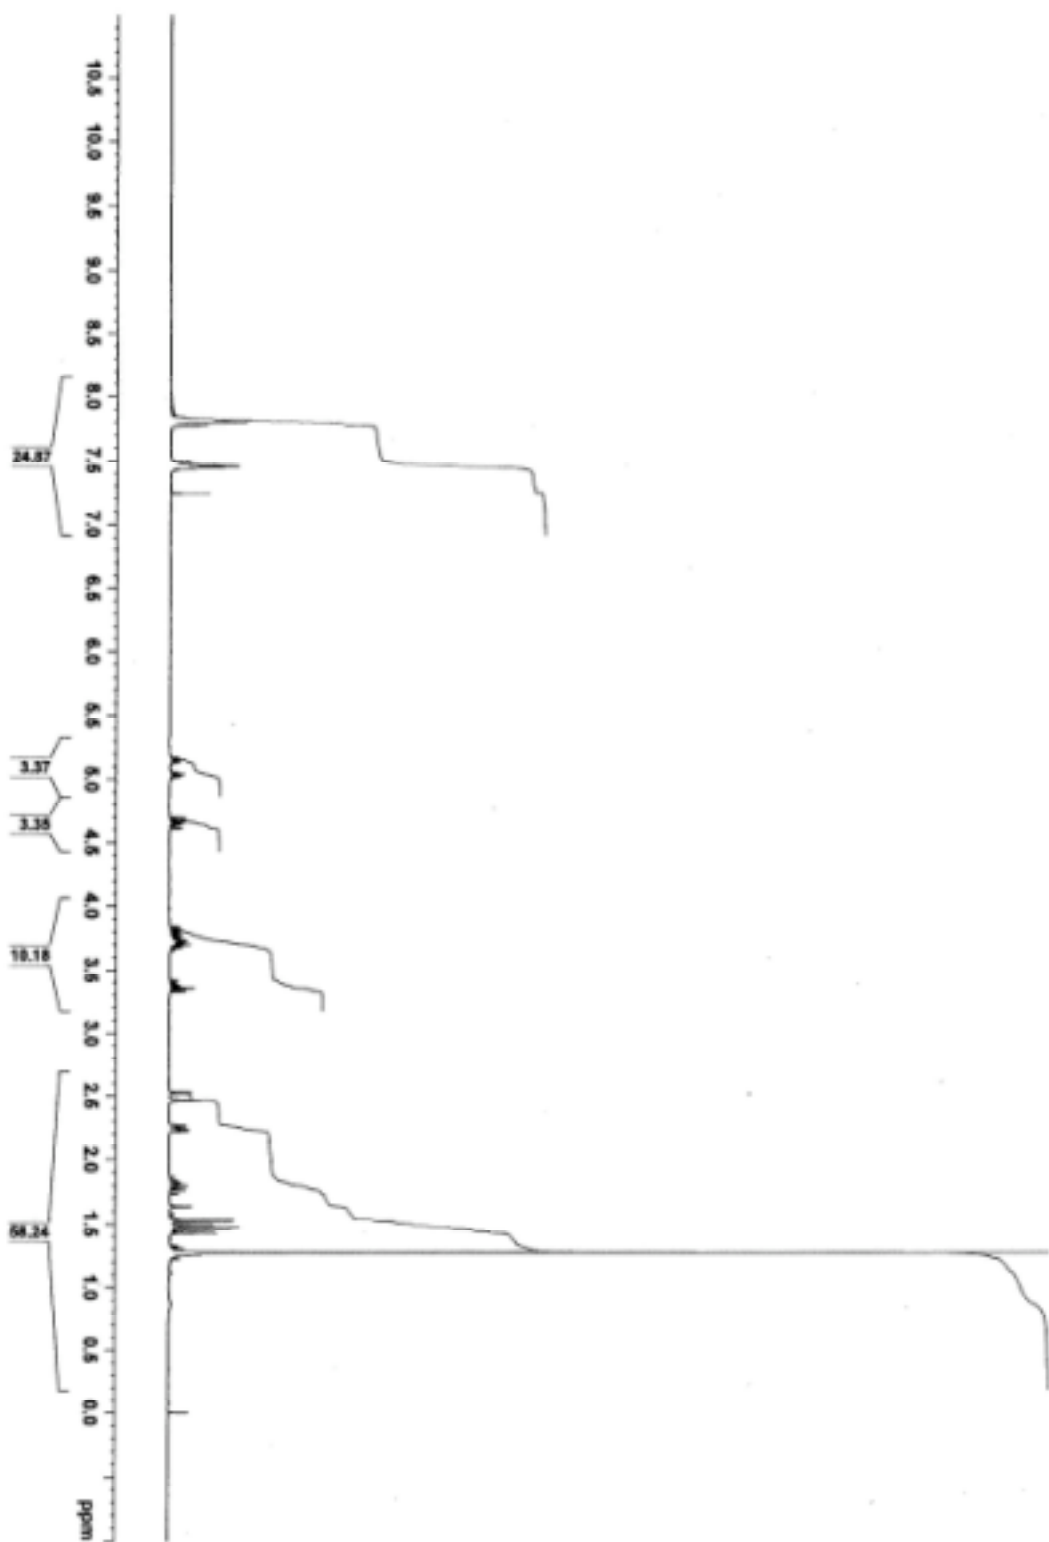

# Glycoside 5f

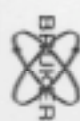

002905.110  
AU PROC:  
X25 AU  
DATE 6-11-0  
TIME 6:26

SF 400.134  
SF0 400.130  
SY 230.0  
O1 6897.559  
SI 32768  
TD 32768  
SM 6064.516  
H2/P1 .492

FW 0.0  
FO 0.0  
AQ 2.032  
RG 10  
NS 48  
TE 297

FM 10100  
D2 4171.003  
DP 63L P0

LB .300  
GB 0.0  
CX 35.00  
CY 19.00  
F1 9.200P  
F2 -800P  
H2/CW 114.321  
PPM/CW 286  
SR 4397.56

D1 1.0000000  
P0 4.30  
RG4  
RO 0.0  
FW 0.0  
DE 77.50  
NS 48  
DS 2

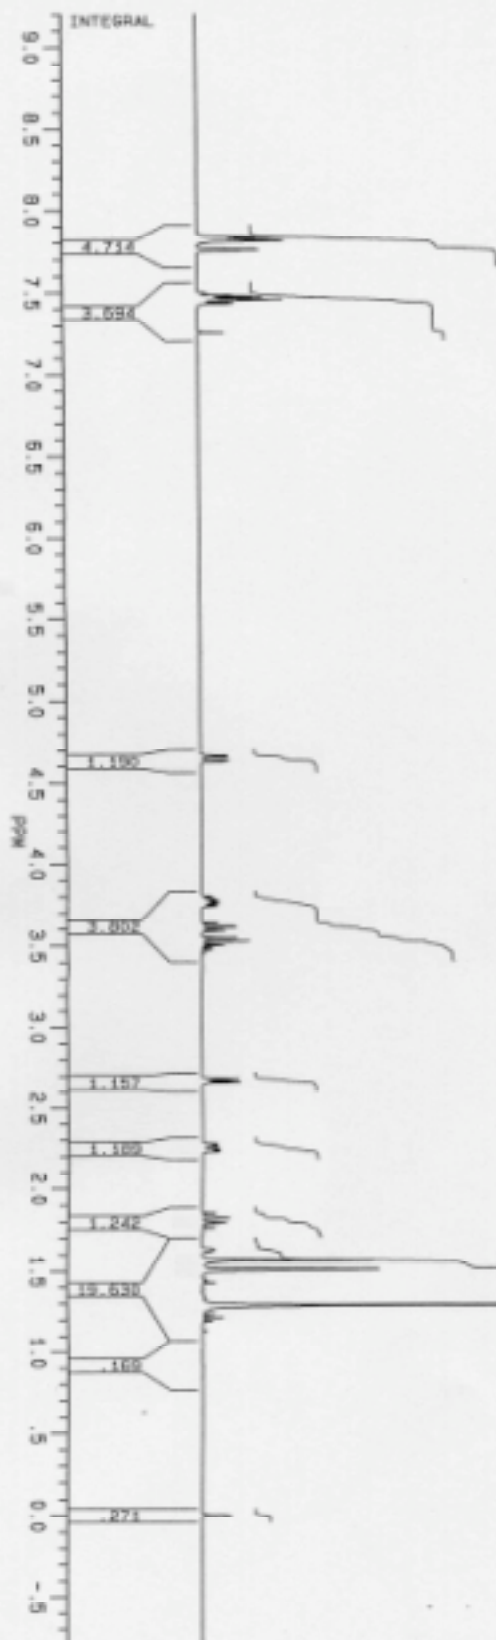



# Glycoside 5g

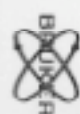

NO2605.101  
AU PROD:  
X25 AU  
DATE 4-12-0  
TIME 0:05

SF 400.134  
SF0 400.130  
SV 230.0  
Q1 6897.559  
S1 32768  
T0 32768  
SW 6064.516  
HZ/PT .492

PM 0.0  
RD 0.0  
AU 2.032  
RG 8  
NS 48  
TE 297

FW 10100  
D2 4171.003  
DP 63L PO

LB .300  
GB 0.0  
CX 35.00  
CY 15.00  
F1 9.200P  
F2 -.803P  
HZ/CN 114.321  
PFW/CN .288  
SR 4601.02

D1 1.0000000  
PO 4.30  
RGA  
RD 0.0  
PM 0.0  
DE 77.50  
NS 48  
OS 2

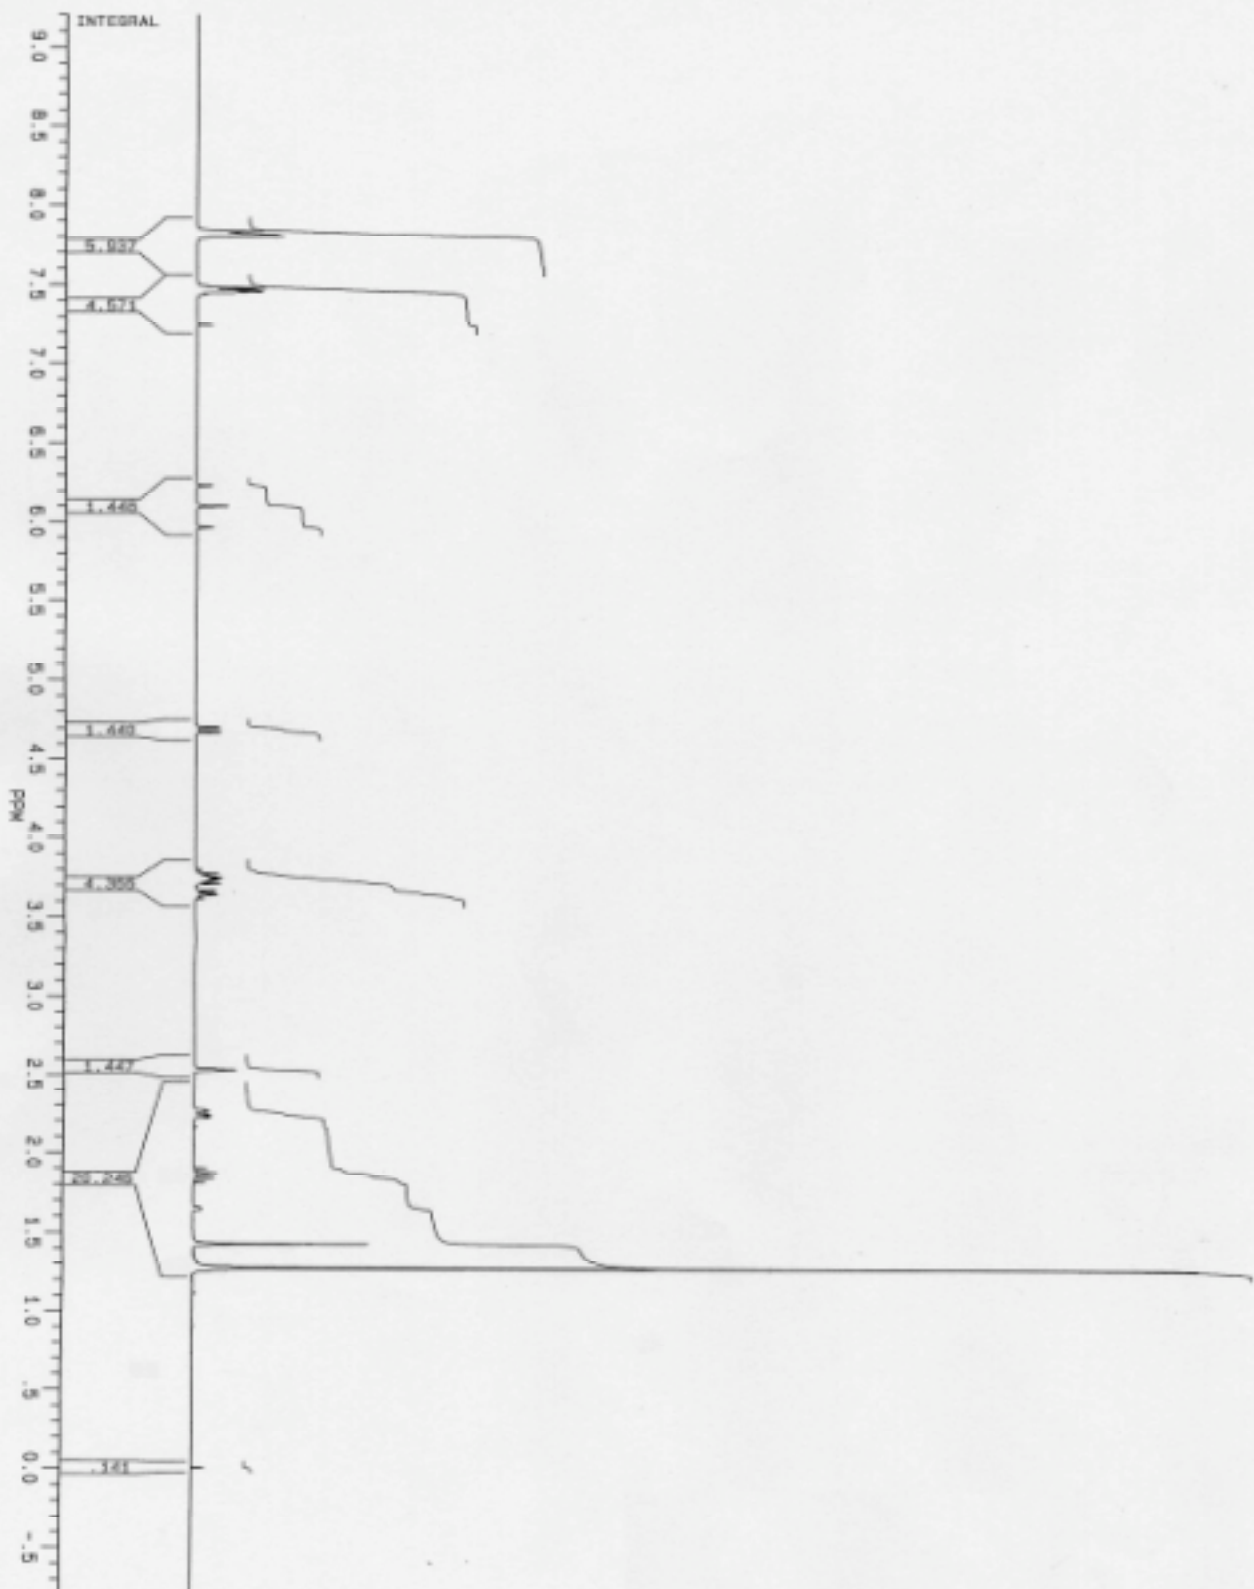

# Glycoside 5h

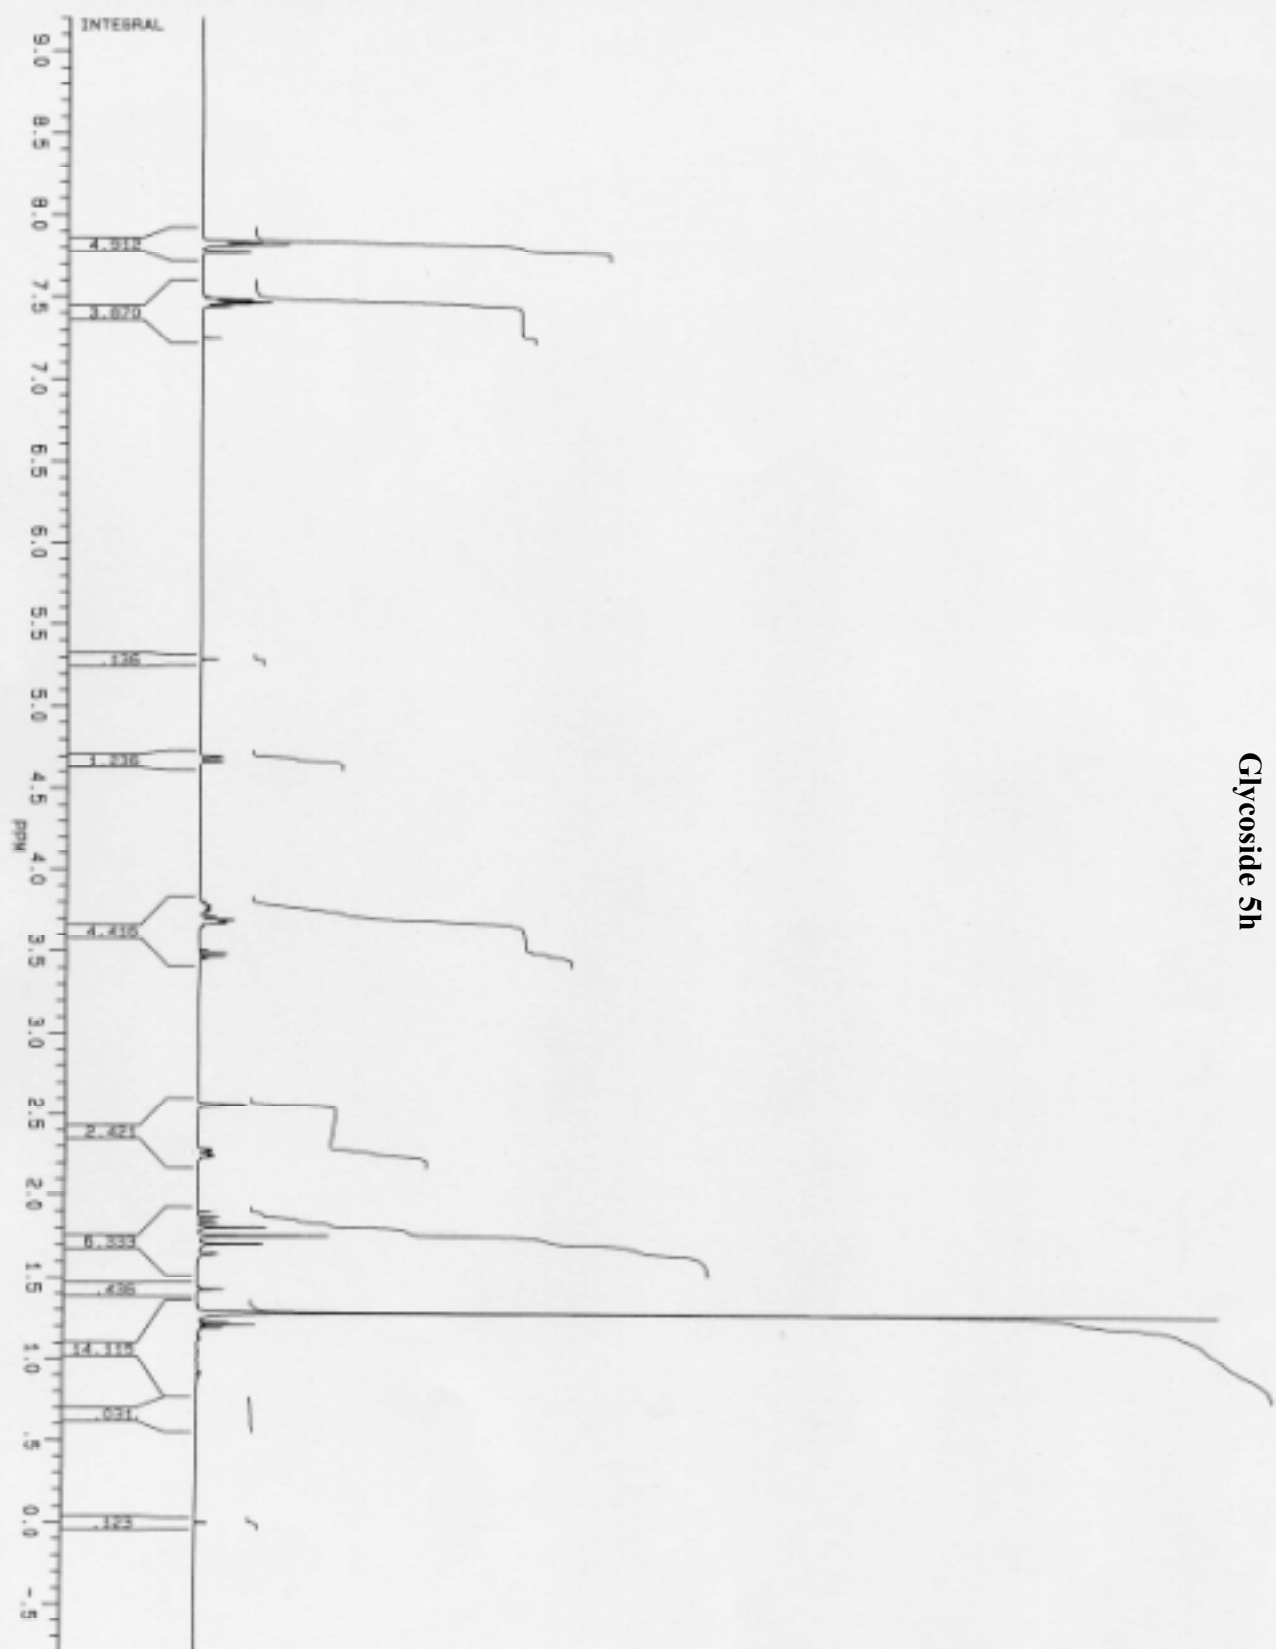

OC3005.108  
 AU PROG: X00.AU  
 DATE 7-11-0  
 TIME 8:53  
 SF 400.134  
 SFO 400.130  
 SY 230.0  
 O1 6897.559  
 S1 32768  
 T0 32768  
 SW 6004.516  
 HZ/P1 .492  
 PM 0.0  
 RO 0.0  
 AQ 2.032  
 RG 0  
 NS 48  
 TE 297  
 FM 10100  
 D2 4171.003  
 DP 63L P0  
 LG 0.300  
 GB 0.0  
 CX 35.00  
 CY 19.00  
 F1 9.200P  
 F2 9.600P  
 HZ/CW 114.321  
 PPM/CW .286  
 SR 4398.07  
 O1 1.0000000  
 P0 4.30  
 RGA  
 RO 0.0  
 PM 0.0  
 DE 77.50  
 NS 48  
 DS 2
